# Supplementary material for: Design and synthesis of sugar-benzohydrazides: low molecular weight organogelators
Source: Royal Society of Chemistry journal article supplement (doi:10.1039/c6ra18715c), 2016-01-01
Supplement: c6ra18715c1.pdf [file c6ra18715c1.pdf]

## Supporting Information

### Design and synthesis of sugar-benzohydrazides: Low molecular weight organogelators

### ~~Design and synthesis of sugar-benzohydrazide-N-glycosylamines: Low molecular weight organogelators self-assemble into nanorods~~

Kamalakaran Soundarajan, Rathinam Periyasamy and Thangamuthu Mohan Das\*

Department of Chemistry, School of Basic and Applied Sciences, Central University of Tamil Nadu, Thiruvarur-610 004, India. E-mail: [tmohandas@cutn.ac.in](mailto:tmohandas@cutn.ac.in); Tel: 04366-277400; Fax: 04366-225312.

|                                    | Description                                                                             | Page       |
|------------------------------------|-----------------------------------------------------------------------------------------|------------|
| <b>S.I. 1</b>                      | Description of experimental techniques                                                  | <u>3</u>   |
| <b>S.I. 2</b>                      | Synthesis and characterization of Benzohydrazine based N-glycosylamines ( <b>8-19</b> ) | <u>34</u>  |
| <b>Figure.S.I-2.1</b><br><u>4</u>  | <sup>1</sup> H NMR spectrum of compound <b>1</b>                                        |            |
| <b>Figure.S.I-2.2</b><br><u>5</u>  | <sup>13</sup> C NMR spectrum of compound <b>1</b>                                       |            |
| <b>Figure.S.I-2.3</b><br><u>6</u>  | <sup>1</sup> H NMR spectrum of compound <b>8</b>                                        |            |
| <b>Figure.S.I-2.4</b><br><u>78</u> | <sup>13</sup> C NMR spectrum of compound <b>8</b>                                       |            |
| <b>Figure.S.I-2.5</b><br><u>89</u> | <sup>1</sup> H NMR spectrum of compound <b>9</b>                                        |            |
| <b>Figure.S.I-2.6</b>              | <sup>1</sup> H NMR spectrum of compound <b>9</b>                                        | <u>944</u> |
| <b>Figure.S.I-2.7</b>              | <u><sup>1</sup>H NMR spectrum of compound <b>10</b></u>                                 | <u>102</u> |

|                                               |                                                             |                                               |
|-----------------------------------------------|-------------------------------------------------------------|-----------------------------------------------|
| <a href="#">Figure.S.I-2.8</a>                | <sup>13</sup> C NMR spectrum of compound <a href="#">10</a> | <a href="#">11</a> <del>10</del>              |
| <a href="#">Figure.S.I-7</a>                  | <sup>1</sup> H NMR spectrum of compound <a href="#">11</a>  | <a href="#">12</a>                            |
| <a href="#">Figure.S.I-2.8</a>                | <sup>13</sup> C NMR spectrum of compound <a href="#">11</a> | <a href="#">13</a>                            |
| <a href="#">Figure.S.I-9</a>                  | <sup>1</sup> H NMR spectrum of compound <a href="#">2</a>   | <a href="#">12</a> <del>5</del> <del>12</del> |
|                                               |                                                             | <a href="#">13</a>                            |
| <a href="#">Figure.S.I-2.10</a>               | <sup>13</sup> C NMR spectrum of compound <a href="#">2</a>  | <a href="#">13</a> <del>6</del> <del>12</del> |
|                                               |                                                             | <a href="#">13</a>                            |
| <a href="#">Figure.S.I-2.11</a>               | <sup>1</sup> H NMR spectrum of compound <a href="#">11</a>  | <a href="#">14</a> <del>7</del> <del>13</del> |
|                                               |                                                             | <a href="#">1</a>                             |
| <a href="#">Figure.S.I-2.12</a>               | <sup>13</sup> C NMR spectrum of compound <a href="#">11</a> | <a href="#">15</a> <del>8</del>               |
| <a href="#">Figure.S.I-2.12</a>               | <sup>13</sup> C NMR spectrum of compound <a href="#">13</a> | <a href="#">20</a>                            |
| <a href="#">Figure.S.I-13</a>                 | <sup>1</sup> H NMR spectrum of compound <a href="#">12</a>  | <a href="#">16</a> <del>9</del> <del>14</del> |
|                                               |                                                             | <a href="#">22</a>                            |
| <a href="#">Figure.S.I-2.14</a>               | <sup>13</sup> C NMR spectrum of compound <a href="#">12</a> |                                               |
|                                               |                                                             | <del>21</del> <del>7</del> <del>14</del>      |
|                                               |                                                             | <a href="#">23</a>                            |
| <a href="#">Figure.S.I-2.15</a>               | <sup>1</sup> H NMR spectrum of compound <a href="#">13</a>  | <a href="#">18</a> <del>22</del>              |
| <a href="#">Figure.S.I-2.16</a>               | <sup>13</sup> C NMR spectrum of compound <a href="#">13</a> | <a href="#">19</a> <del>23</del>              |
| <a href="#">Figure.S.I-2.17</a> <del>45</del> | <sup>1</sup> H NMR spectrum of compound <a href="#">14</a>  | <a href="#">20</a> <del>4</del>               |
| <a href="#">Figure.S.I-2.18</a>               | <sup>13</sup> C NMR spectrum of compound <a href="#">14</a> | <a href="#">21</a> <del>5</del>               |
| <a href="#">Figure.S.I-2.19</a>               | <sup>1</sup> H NMR spectra of compound <a href="#">15</a>   | <a href="#">22</a> <del>6</del> <del>25</del> |
| <a href="#">Figure.S.I-2.20</a> <del>16</del> | <sup>13</sup> C NMR spectra of compound <a href="#">15</a>  | <a href="#">23</a> <del>7</del> <del>26</del> |
| <a href="#">Figure.S.I-2.21</a>               | <sup>1</sup> H NMR spectrum of compound <a href="#">16</a>  | <a href="#">24</a> <del>8</del>               |
| <a href="#">Figure.S.I-2.22</a>               | <sup>13</sup> C NMR spectrum of compound <a href="#">16</a> | <a href="#">25</a> <del>9</del> <del>29</del> |
| <a href="#">Figure.S.I-2.23</a> <del>15</del> | <sup>1</sup> H NMR spectrum of compound <a href="#">17</a>  | <a href="#">26</a> <del>3</del> <del>0</del>  |
| <a href="#">Figure.S.I-2.24</a>               | <sup>13</sup> C NMR spectrum of compound <a href="#">17</a> | <a href="#">27</a> <del>3</del> <del>1</del>  |

**Figure.S.I-2.25**  $^1\text{H}$  NMR spectra of compound **18**

~~283~~~~225~~

**Figure.S.I-2.26**  $^{13}\text{C}$  NMR spectra of compound **18**

~~293~~~~326~~

**Figure.S.I-2.27**  $^1\text{H}$  NMR spectrum of compound **19** ~~304~~

**Figure.S.I-2.28**  $^{13}\text{C}$  NMR spectrum of compound **19** ~~315~~

**S.I. 3** Digital photograph of gel of compound **8** ~~326~~

**Figure. S.I.3.1** Digital photograph of gel in 1, 2-dichloroethane of compound ~~326~~

29

## **S.I. 1 Description of experimental techniques.**

### **S.I. 1.1: NMR**

NMR spectra were recorded on a Bruker DRX 300 MHz instrument in  $\text{CDCl}_3$  (with a few drops of  $\text{DMSO-d}_6$ ). Chemical shifts are referenced to internal TMS.

### **S.I. 1.2: Field emission - scanning electron microscopy (FE-SEM)**

Field emission-scanning electron microscopic studies were performed by using Hitachi Scanning Electron Microscope SU3500. The samples were prepared by drop casting of dichloroethaneethanol gel of glycosidic gelators on aluminium studs at the required concentrations at ambient conditions. FE-SEM images were obtained after drying the sample at ambient temperature.

### **S.I. 1.3: Transmission electron microscopy (TEM)**

Transmission electron microscopic studies were performed by using Hitachi Transmission electron microscope H-9500. The samples were prepared by drop casting of dichloroethaneethanol solution of glycoside (**11**) on to carbon coated copper grids (400 mesh) at the concentration of  $1 \times 10^{-5}$  M at ambient conditions. TEM images were obtained after drying the sample and without staining in vacuum

### **S.I. 1.4: Fourier Transform - Infrared spectroscopy (FT-IR)**

Fourier Transform - Infrared spectroscopy studies were performed by using Agilent Technology Carry 630 FT-IR. The samples were analyzed by directly putting them under attenuated total reflectance (ATR) mode.

### **S.I. 1.5: Rheological studies**

Rheological measurements were carried out with Anton Paar-Rheoplus instrument. Oscillatory experiments were performed in a 0.001–100 Hz frequency range with 0.1 % constant strain on 0.53 % gel of 8 in 1,2-dichloroethaneethanol at 25°C.

### **S.I. 1.6: XRD analysis**

PXRD patterns are recorded by X-ray diffractometer with  $\text{CuK}_\alpha$  radiation source. The scan rate was  $0.5^\circ/\text{min}$ . The xerogel was prepared by evaporating gel prepared in ethanol at room temperature.

### **S.I. 1.7: Photo physical studies**

UV-vis spectrophotometer and fluorescence spectrophotometer studies were performed by Agilent Technology UV-Vis spectrophotometer and Agilent Technology Carry Eclipse Fluorescence spectrophotometers. The samples were prepared from absorption and emission spectra of the N-glycosylamine was recorded at the concentration of  $5 \times 10^{-5}$  M in dichloroethane as a solvents

•

## **S.I. 2 Synthesis and characterization of benzohydrazine based N-glycosylamine (1).**

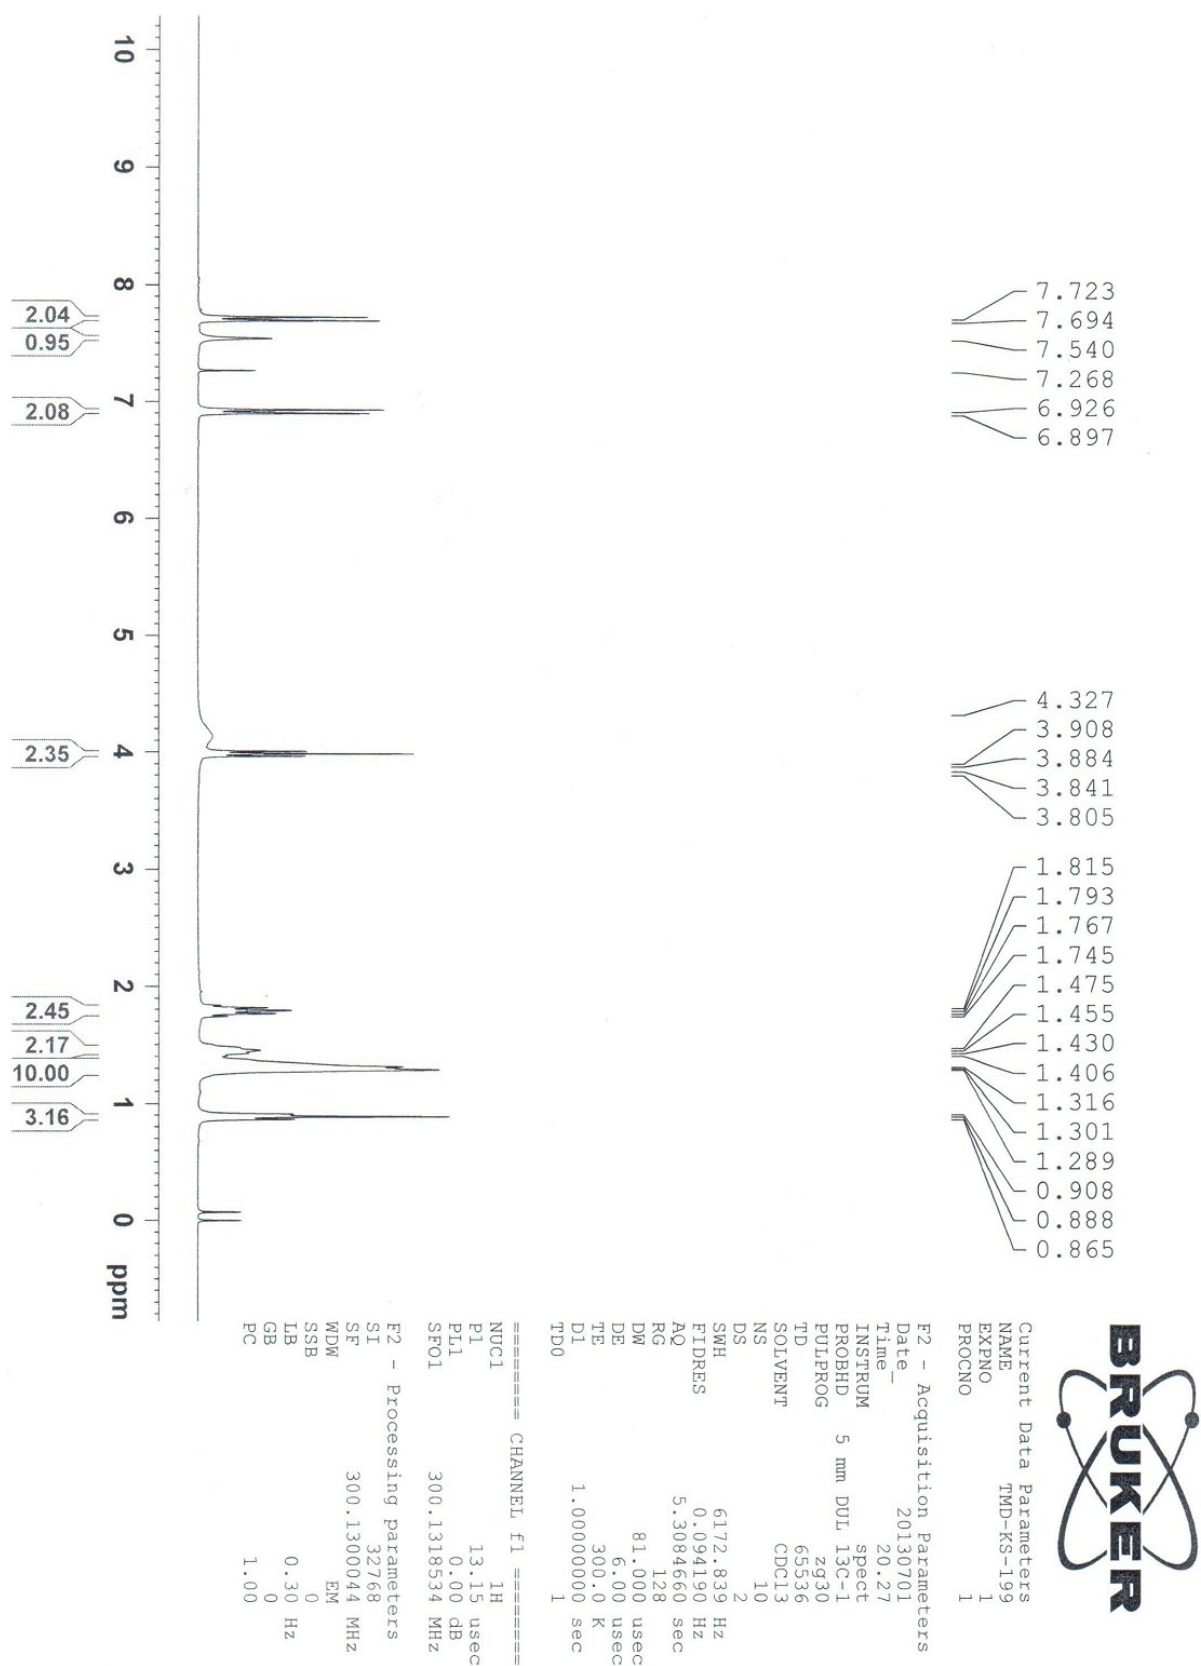

Fig. S.I.2.1: <sup>1</sup>H NMR spectrum of compound 1

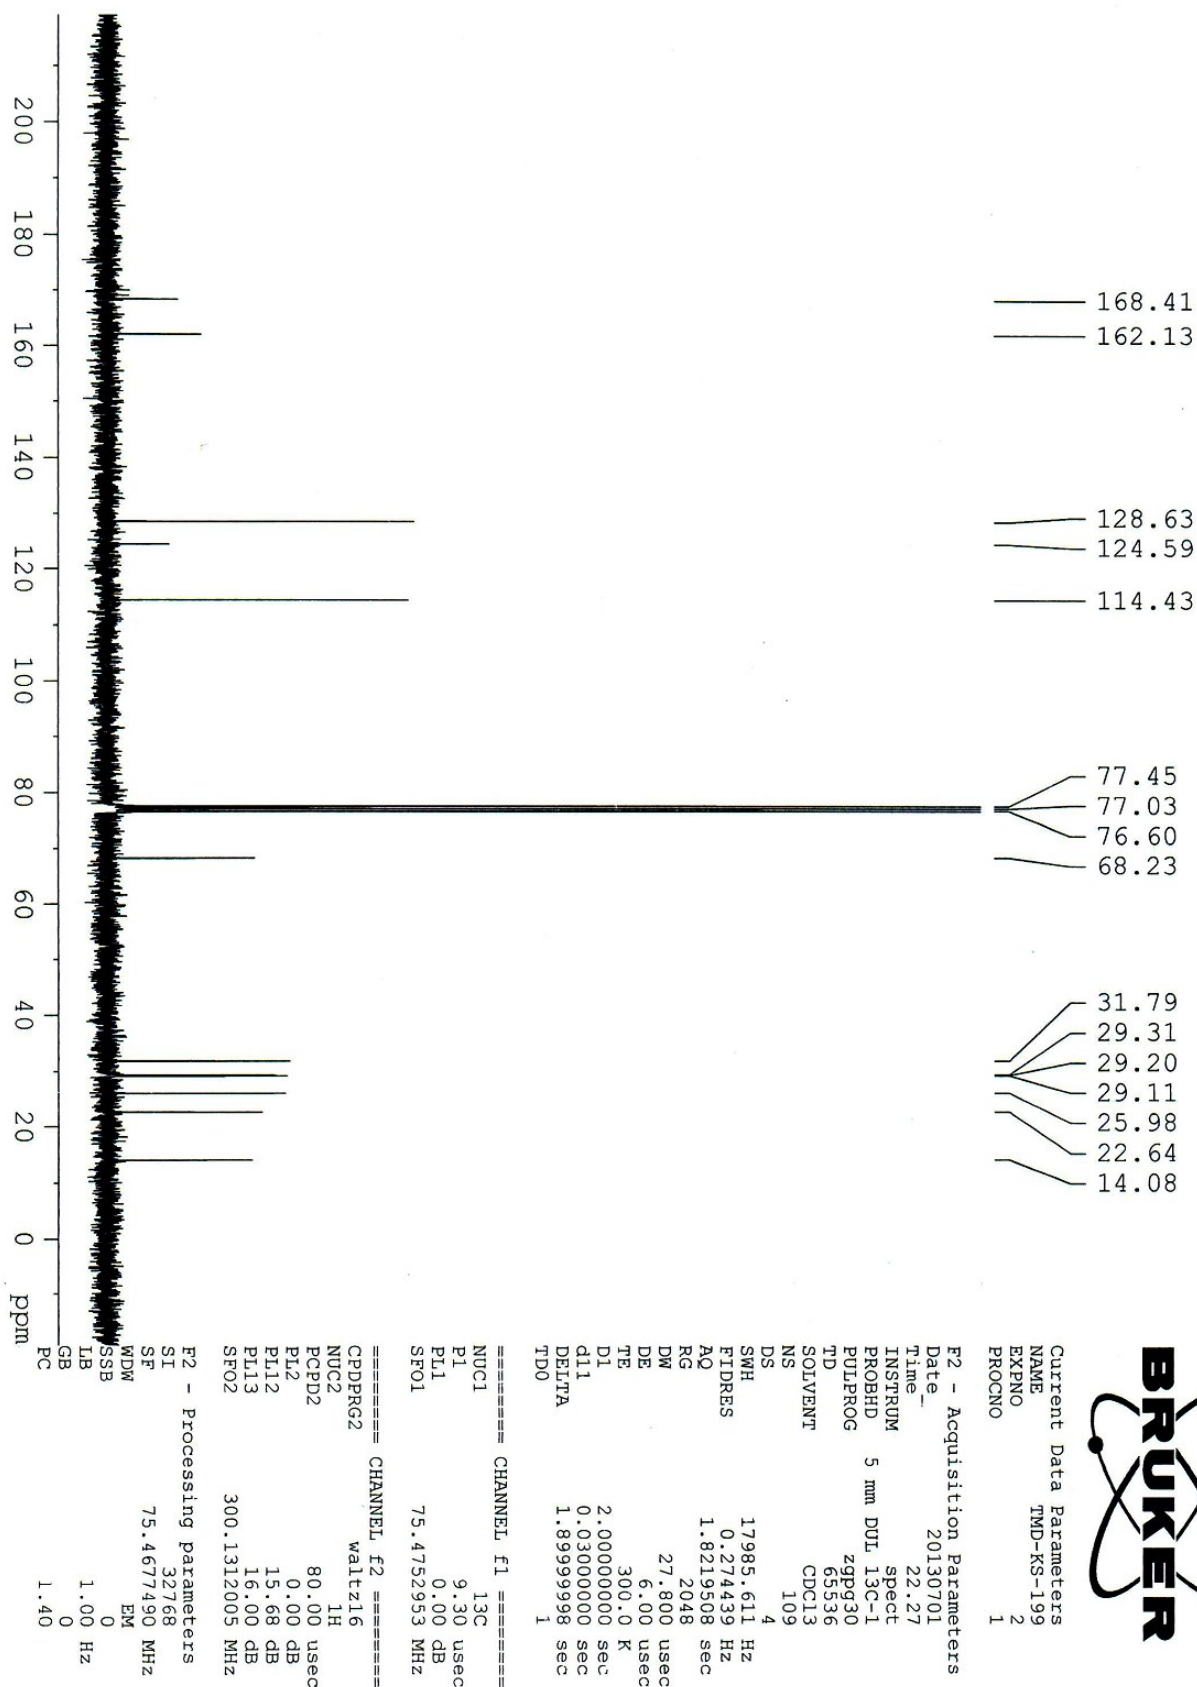

Fig. S.I.2.2:  $^{13}\text{C}$  NMR spectrum of compound 1

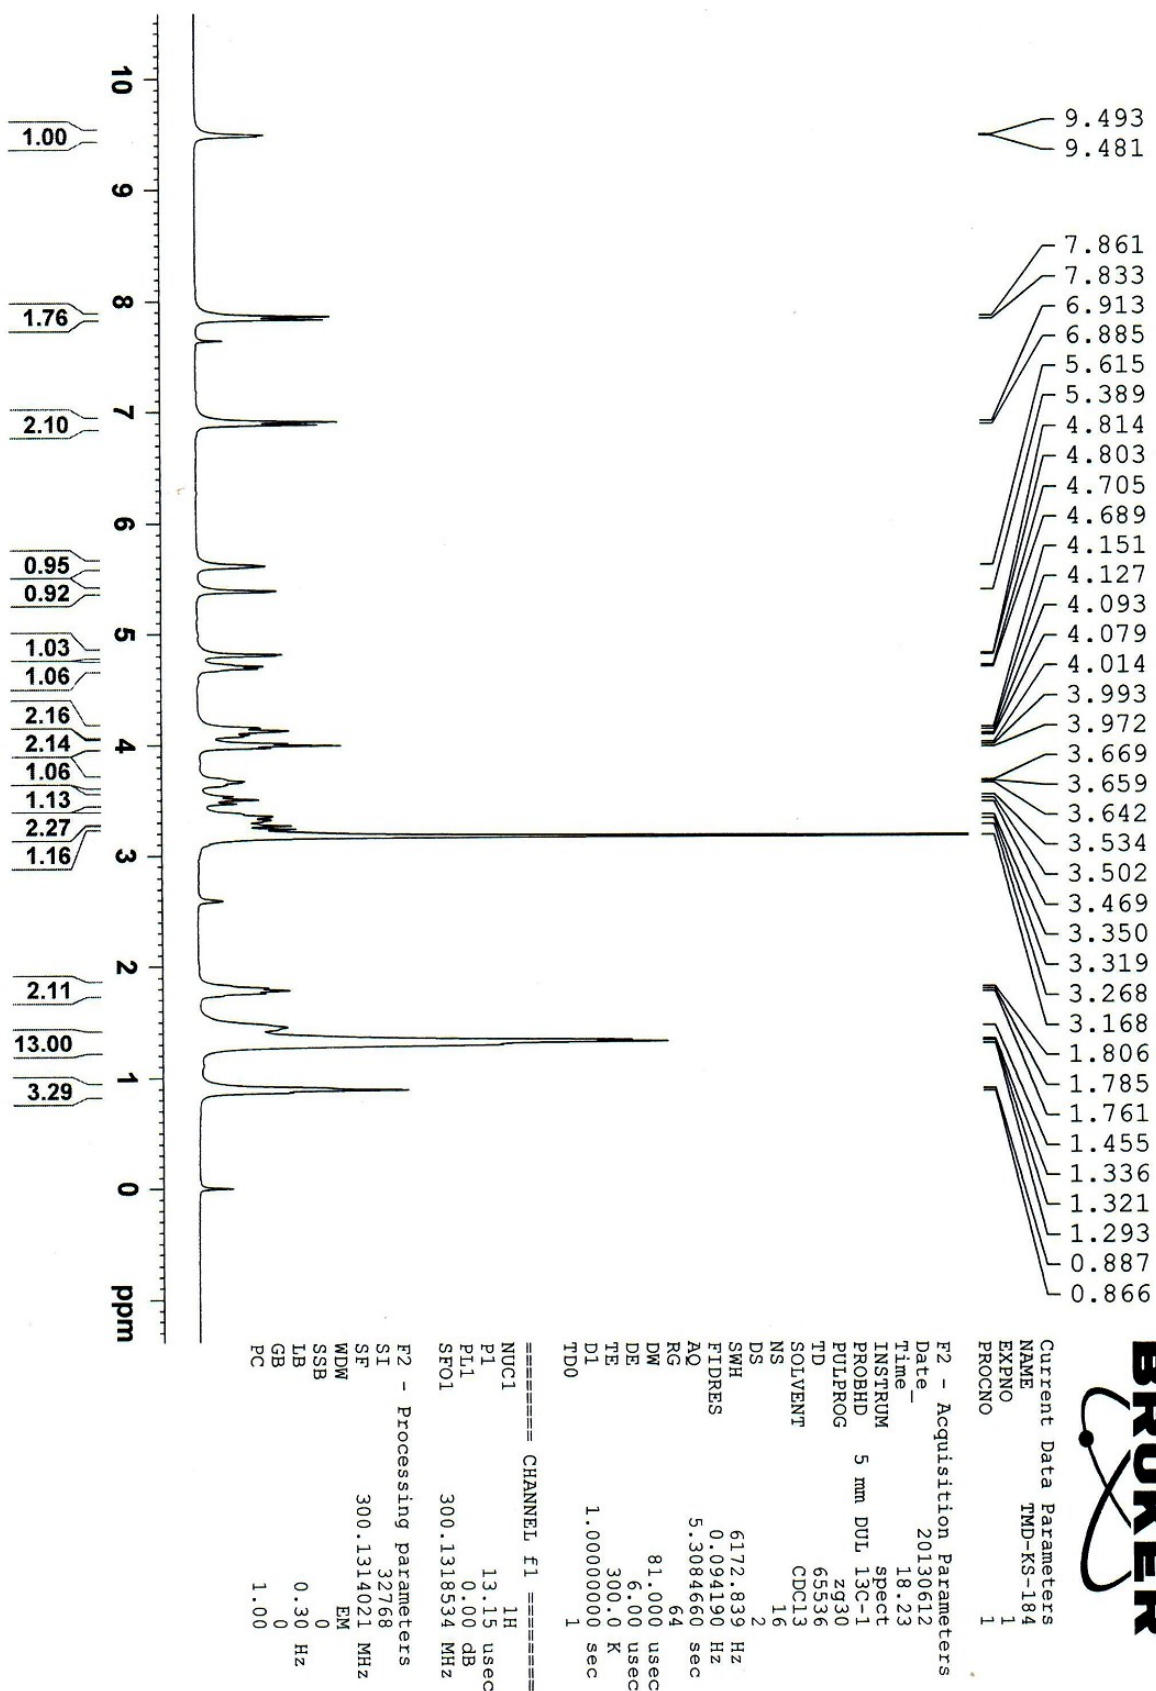Fig. S.I.2.3:  $^1\text{H}$  NMR spectrum of compound 8



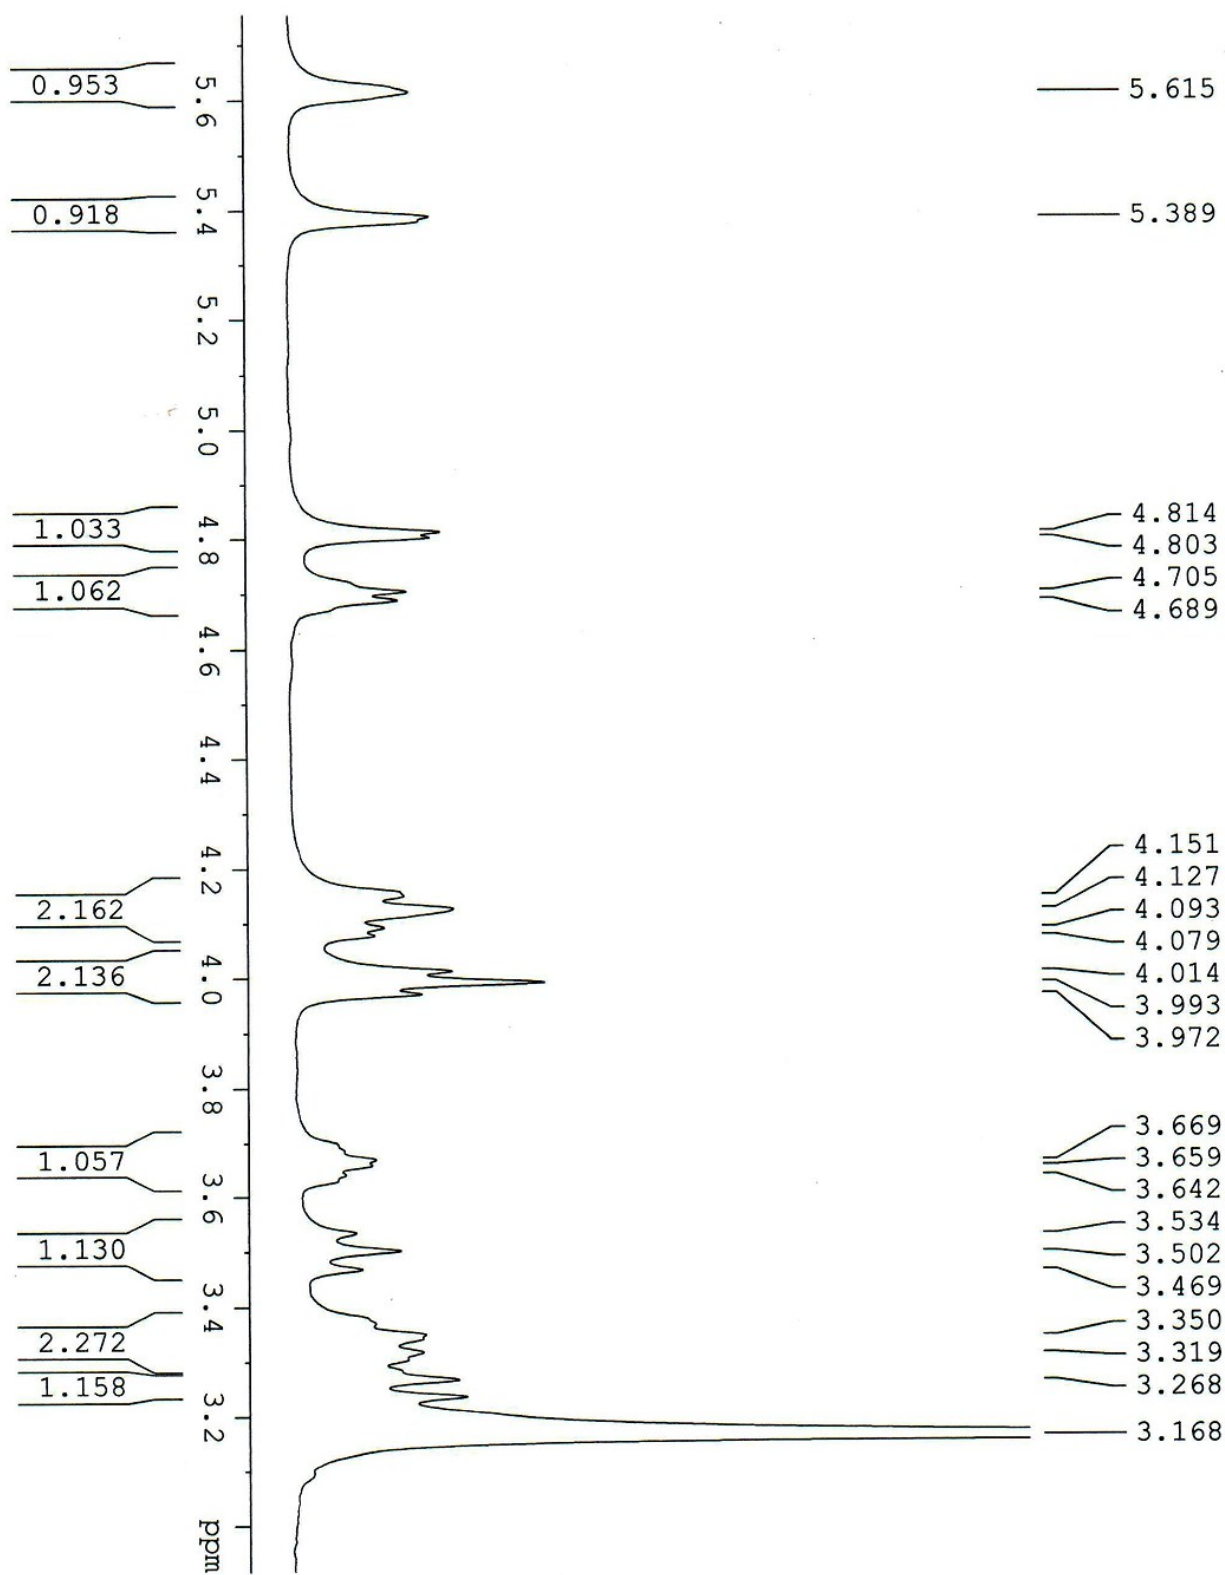

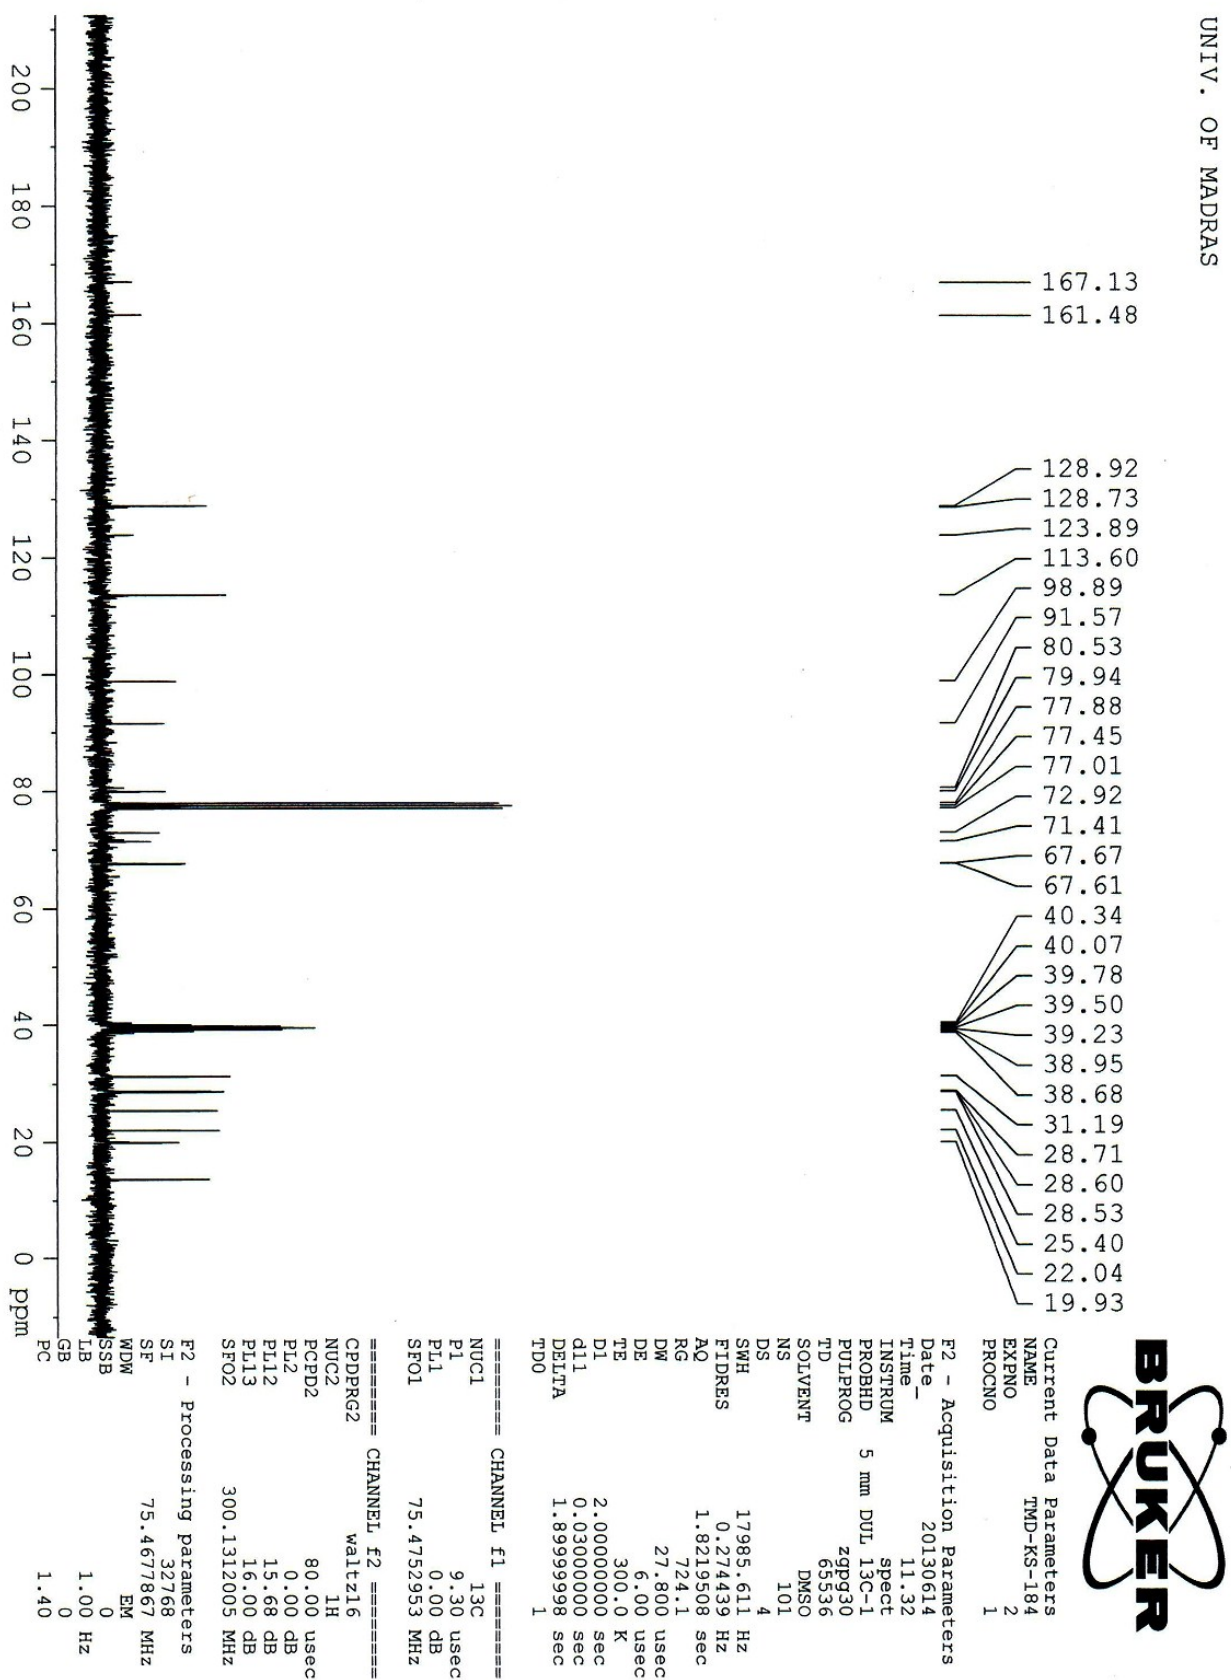Fig. S.I.2.4:  $^{13}\text{C}$  NMR spectrum of compound 8

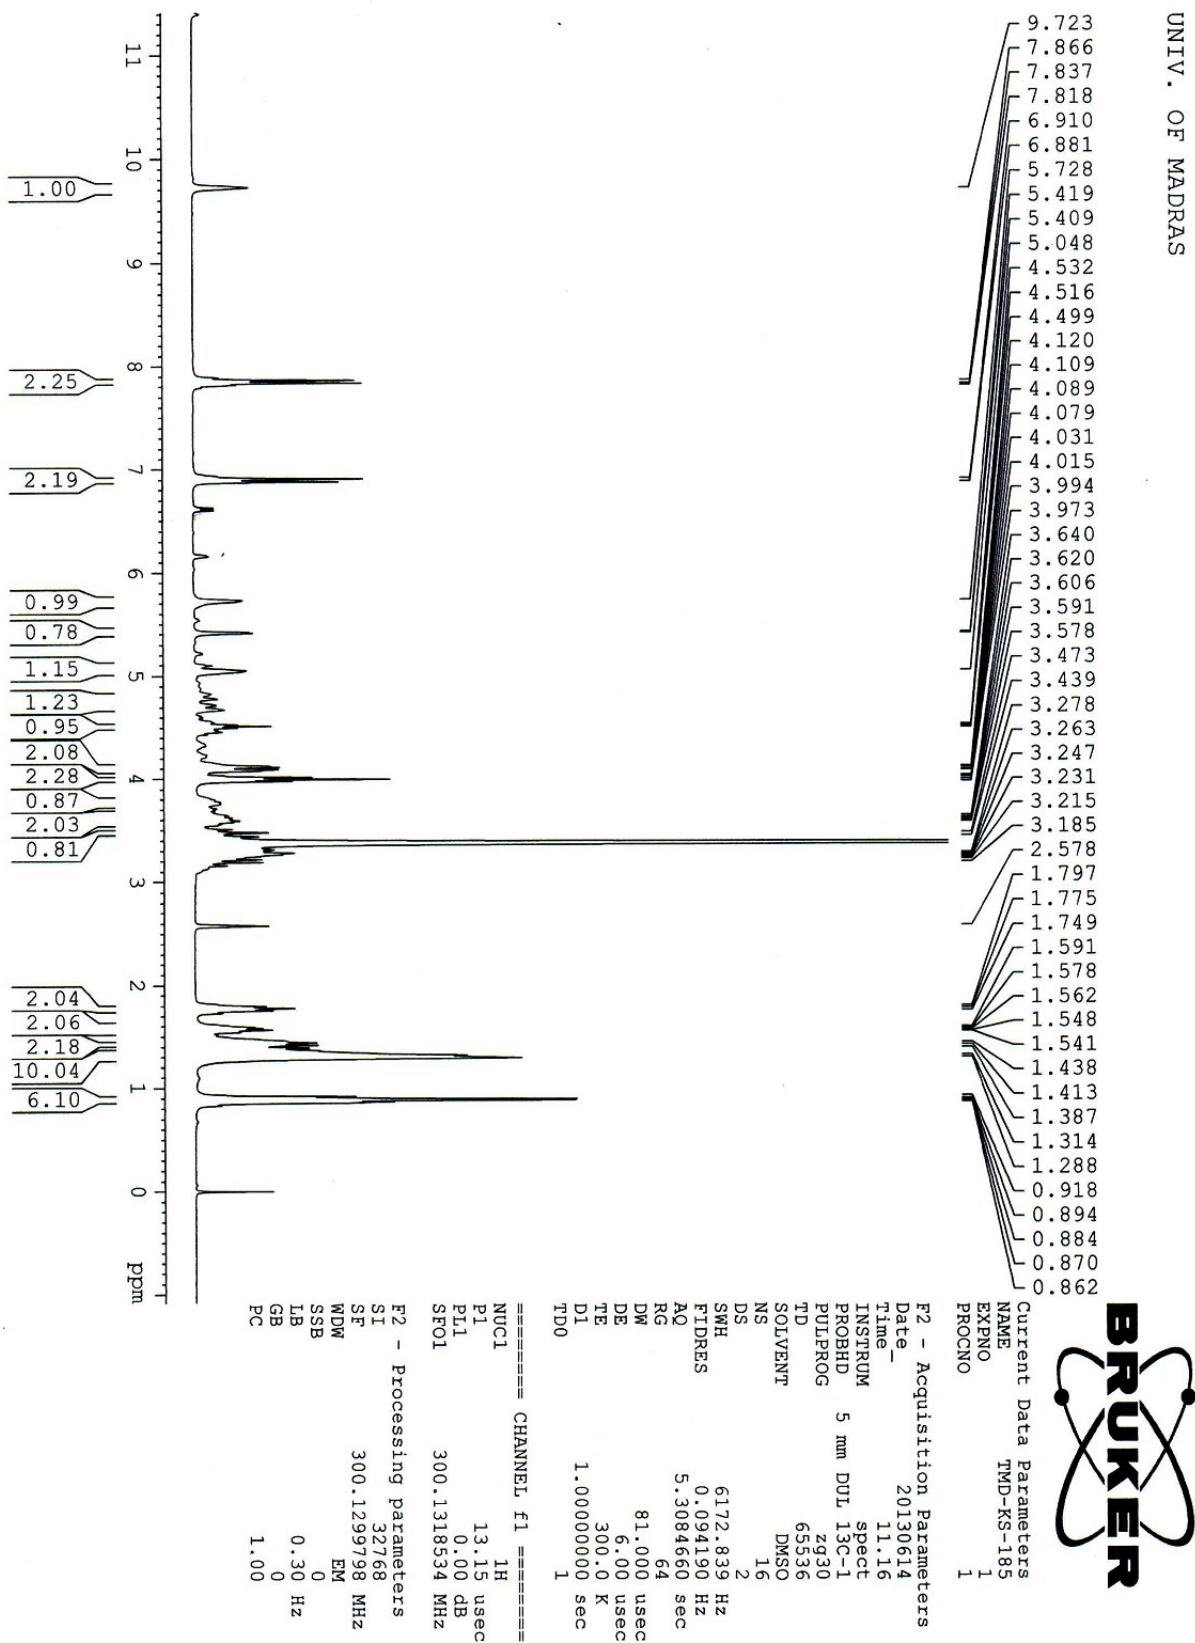

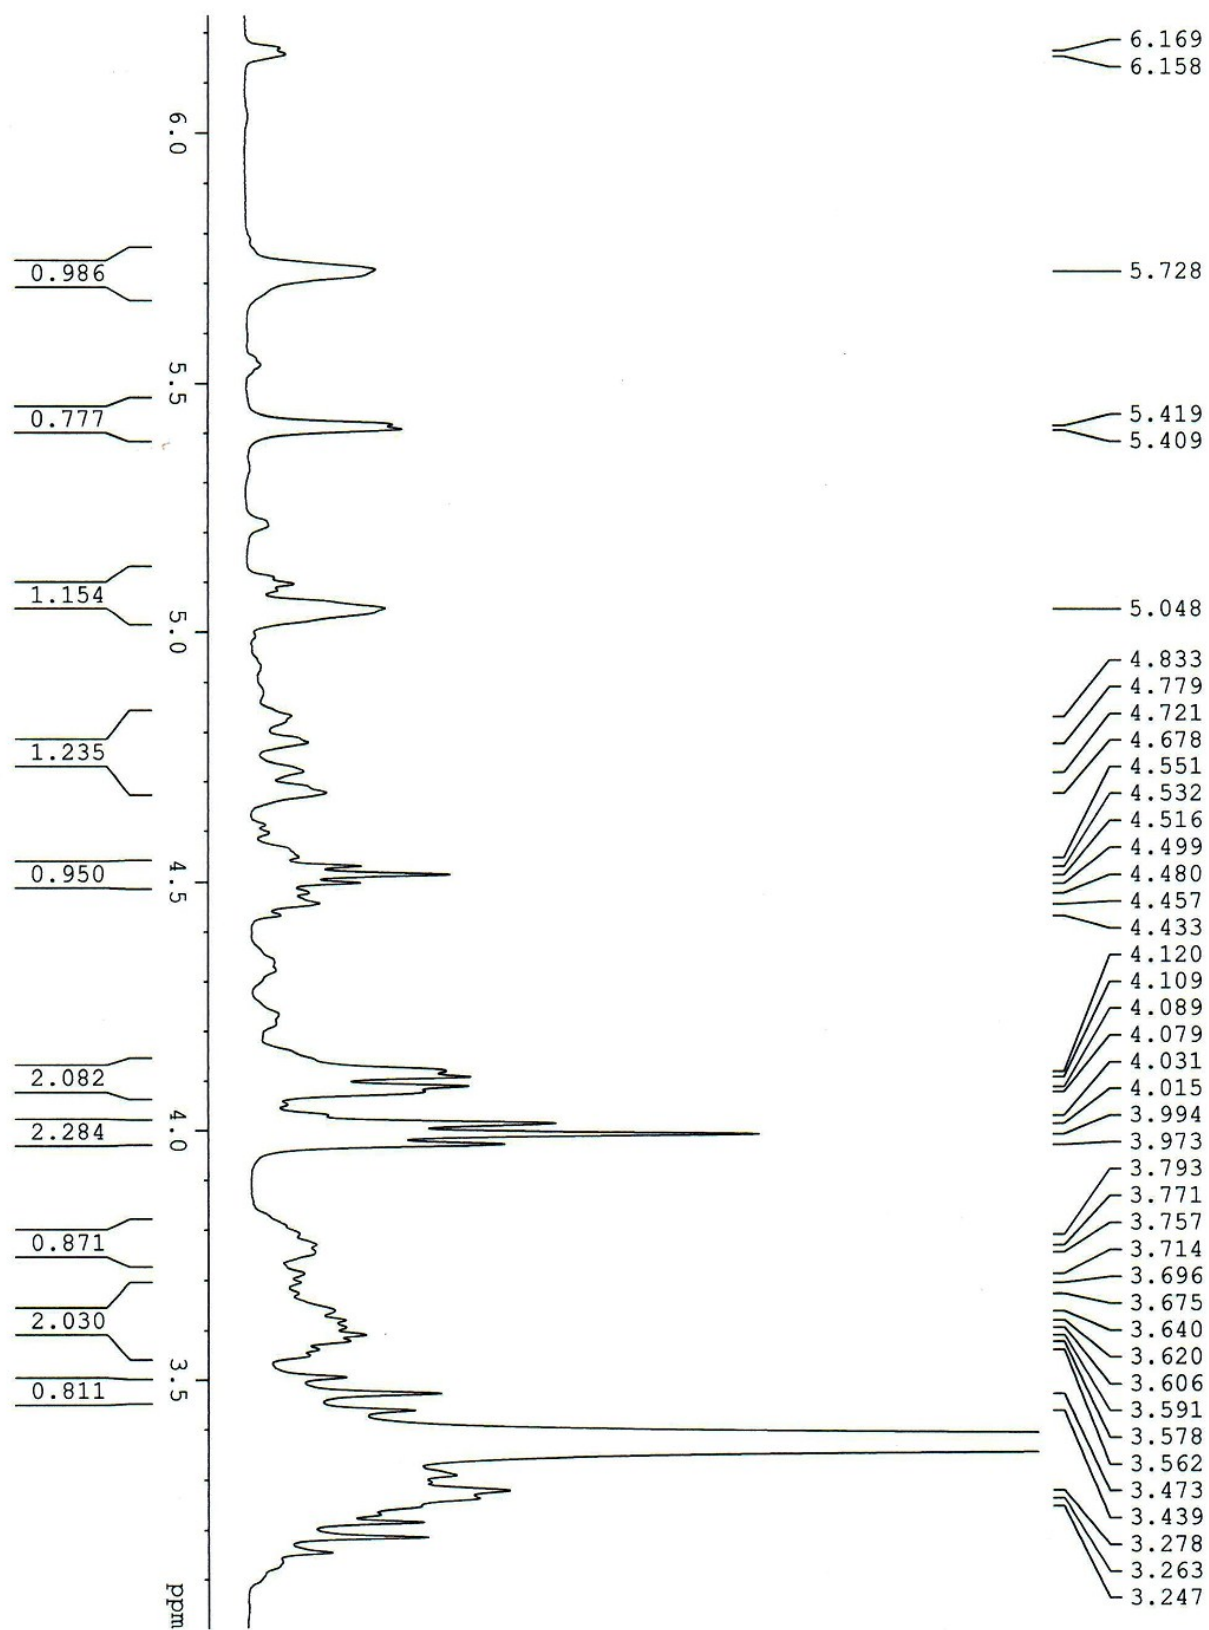

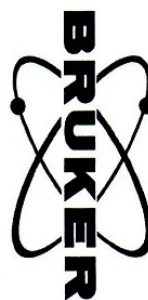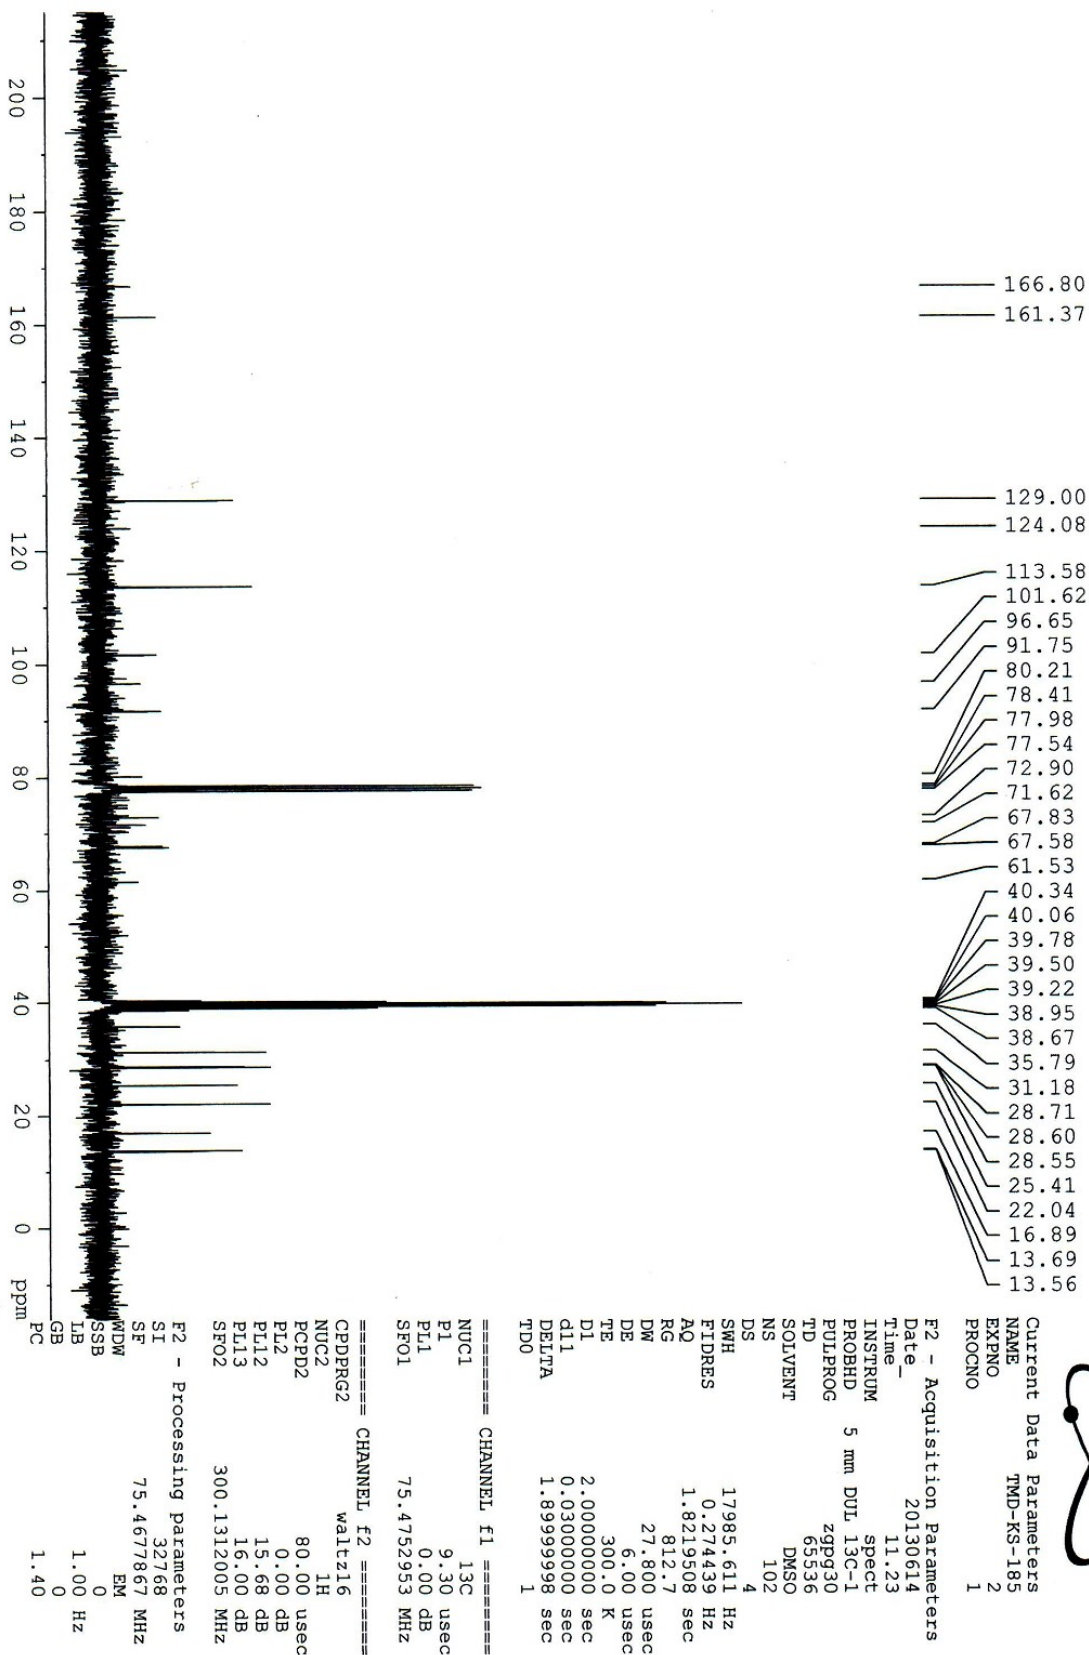Fig. S.I.2.6:  $^{13}\text{C}$  NMR spectrum of compound 9



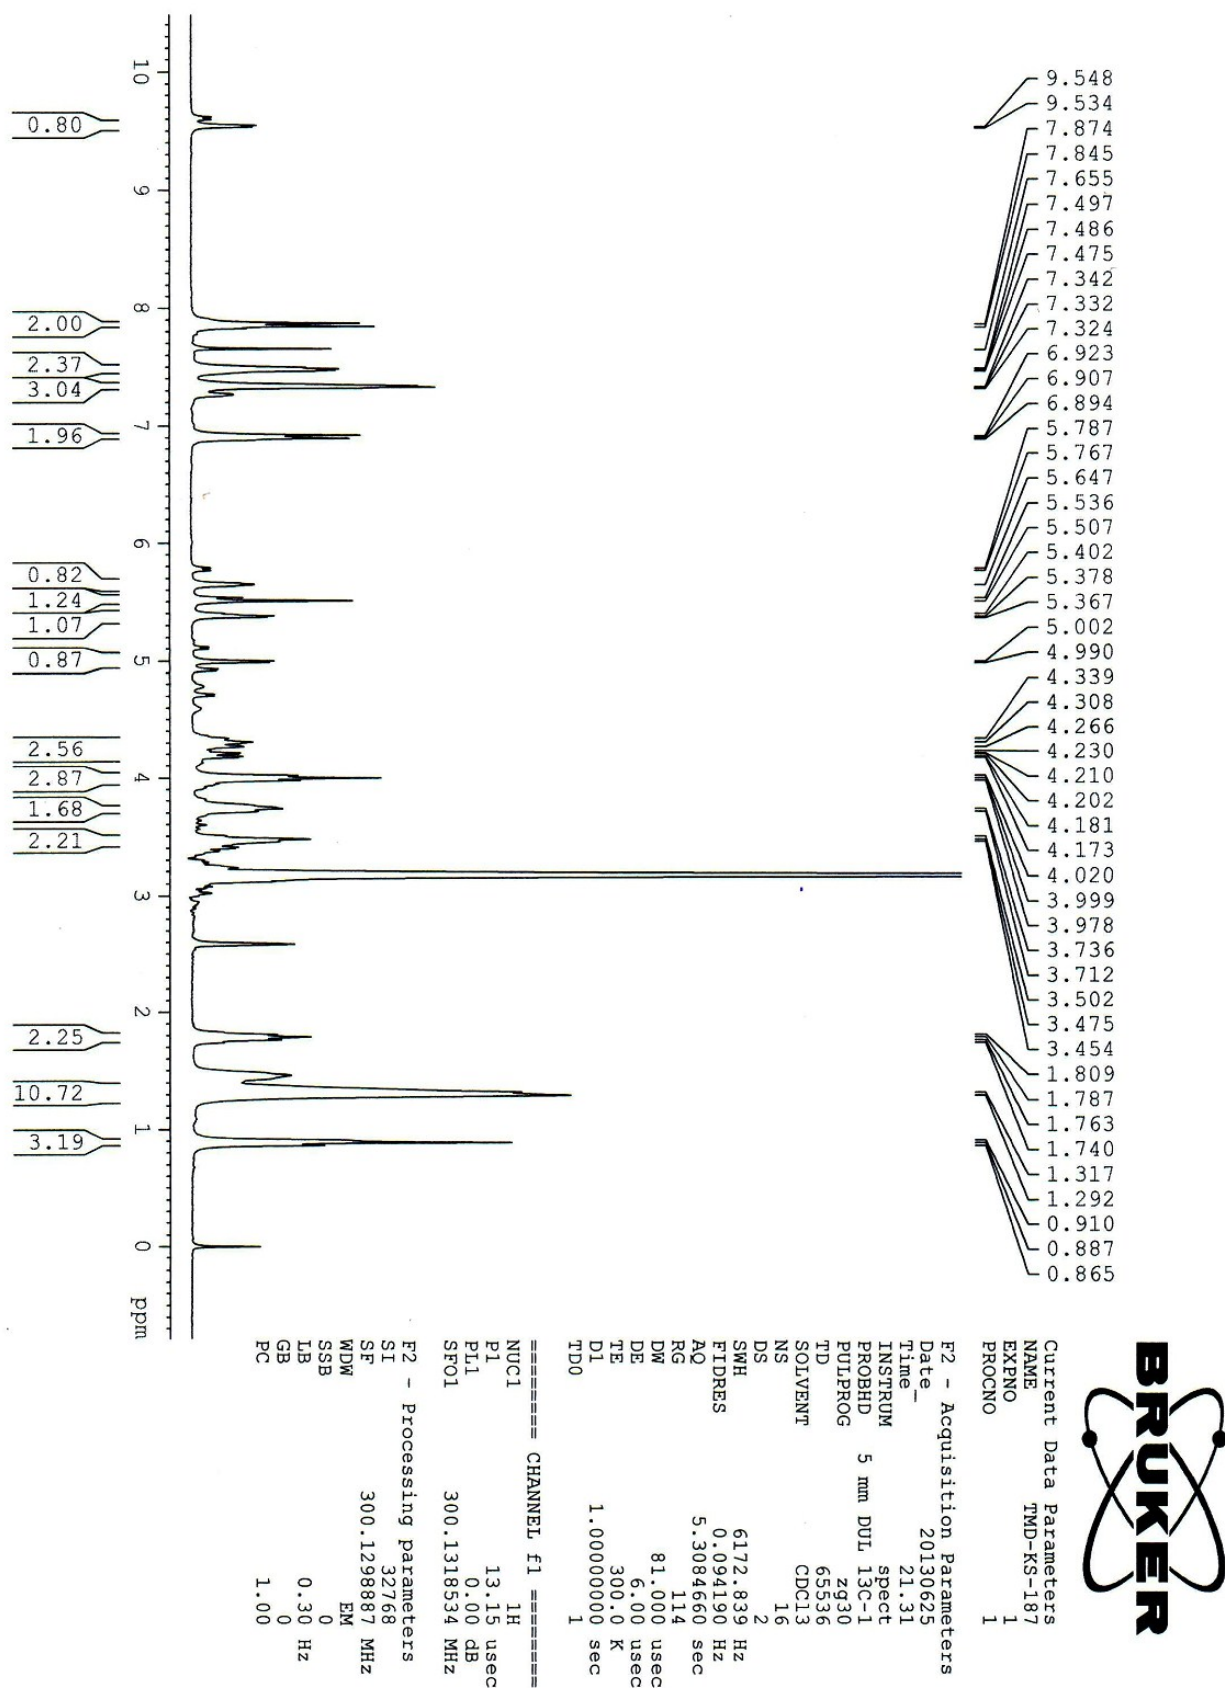

Fig. S.I.2.7:  $^1\text{H}$  NMR spectrum of compound 10

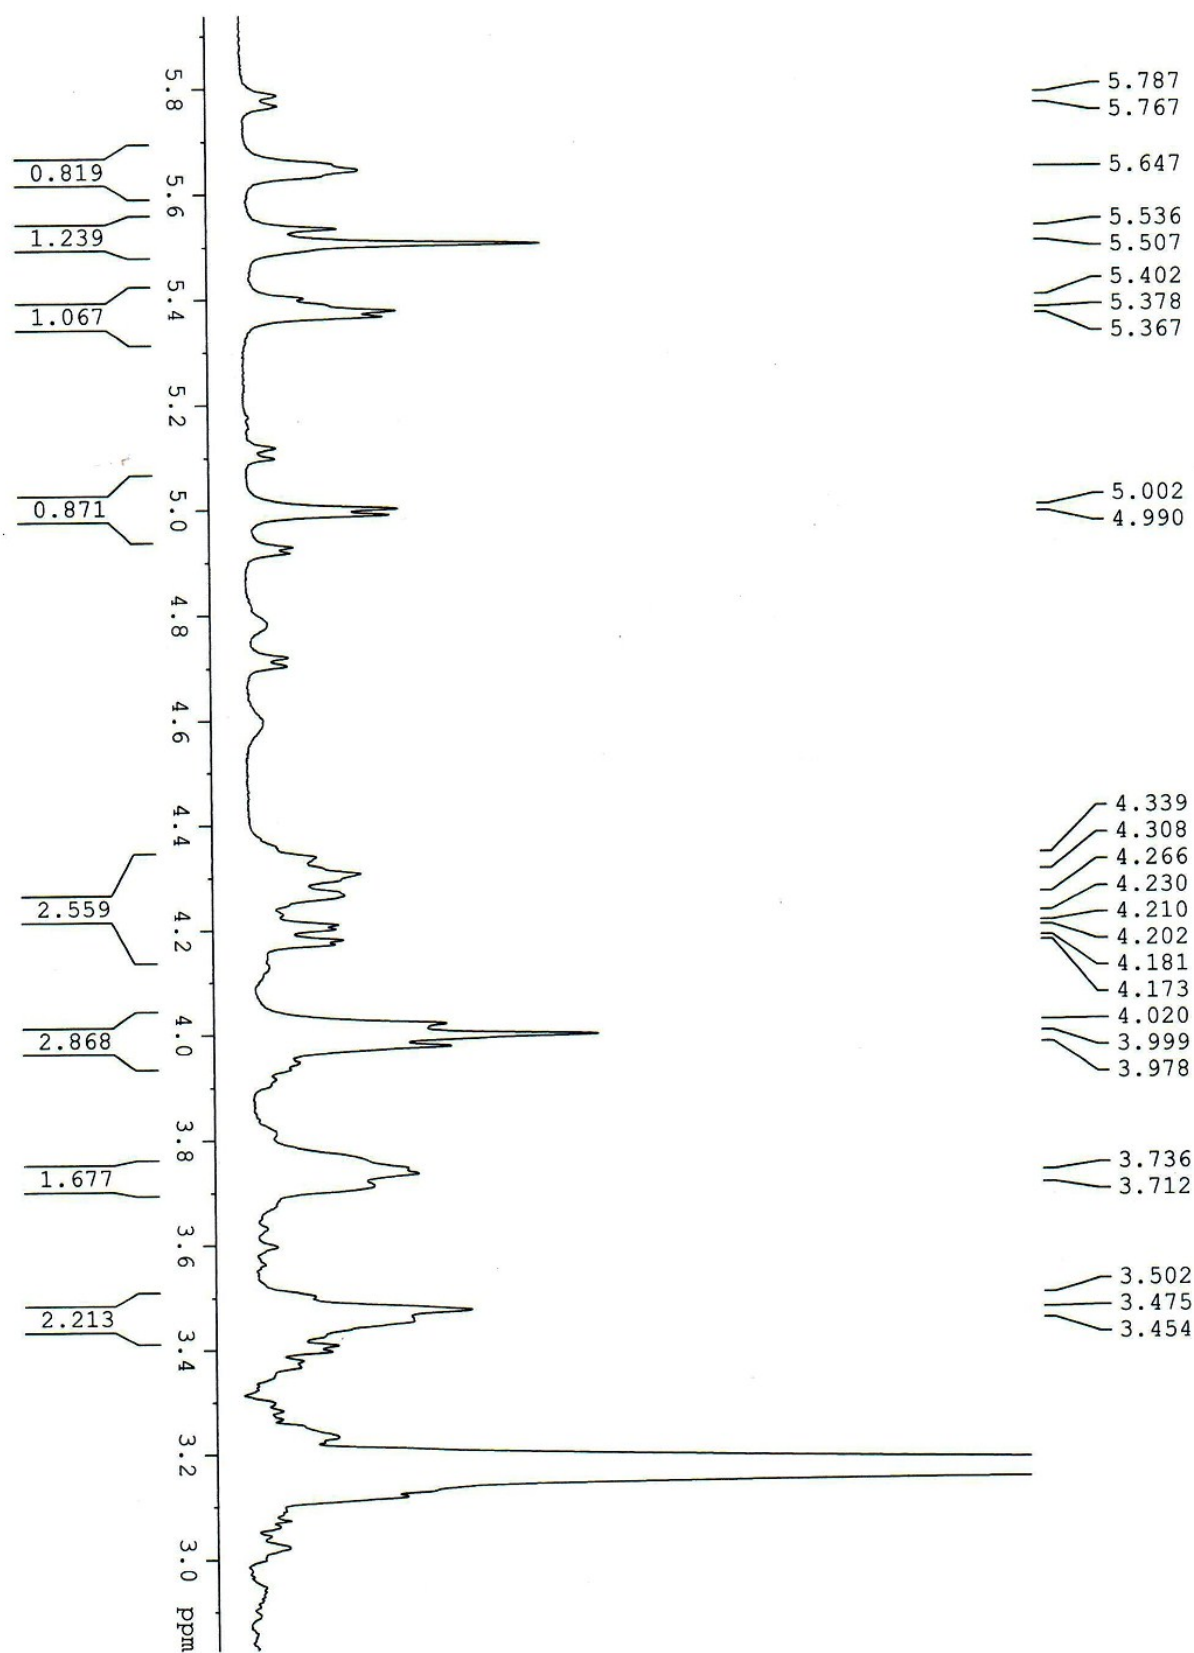

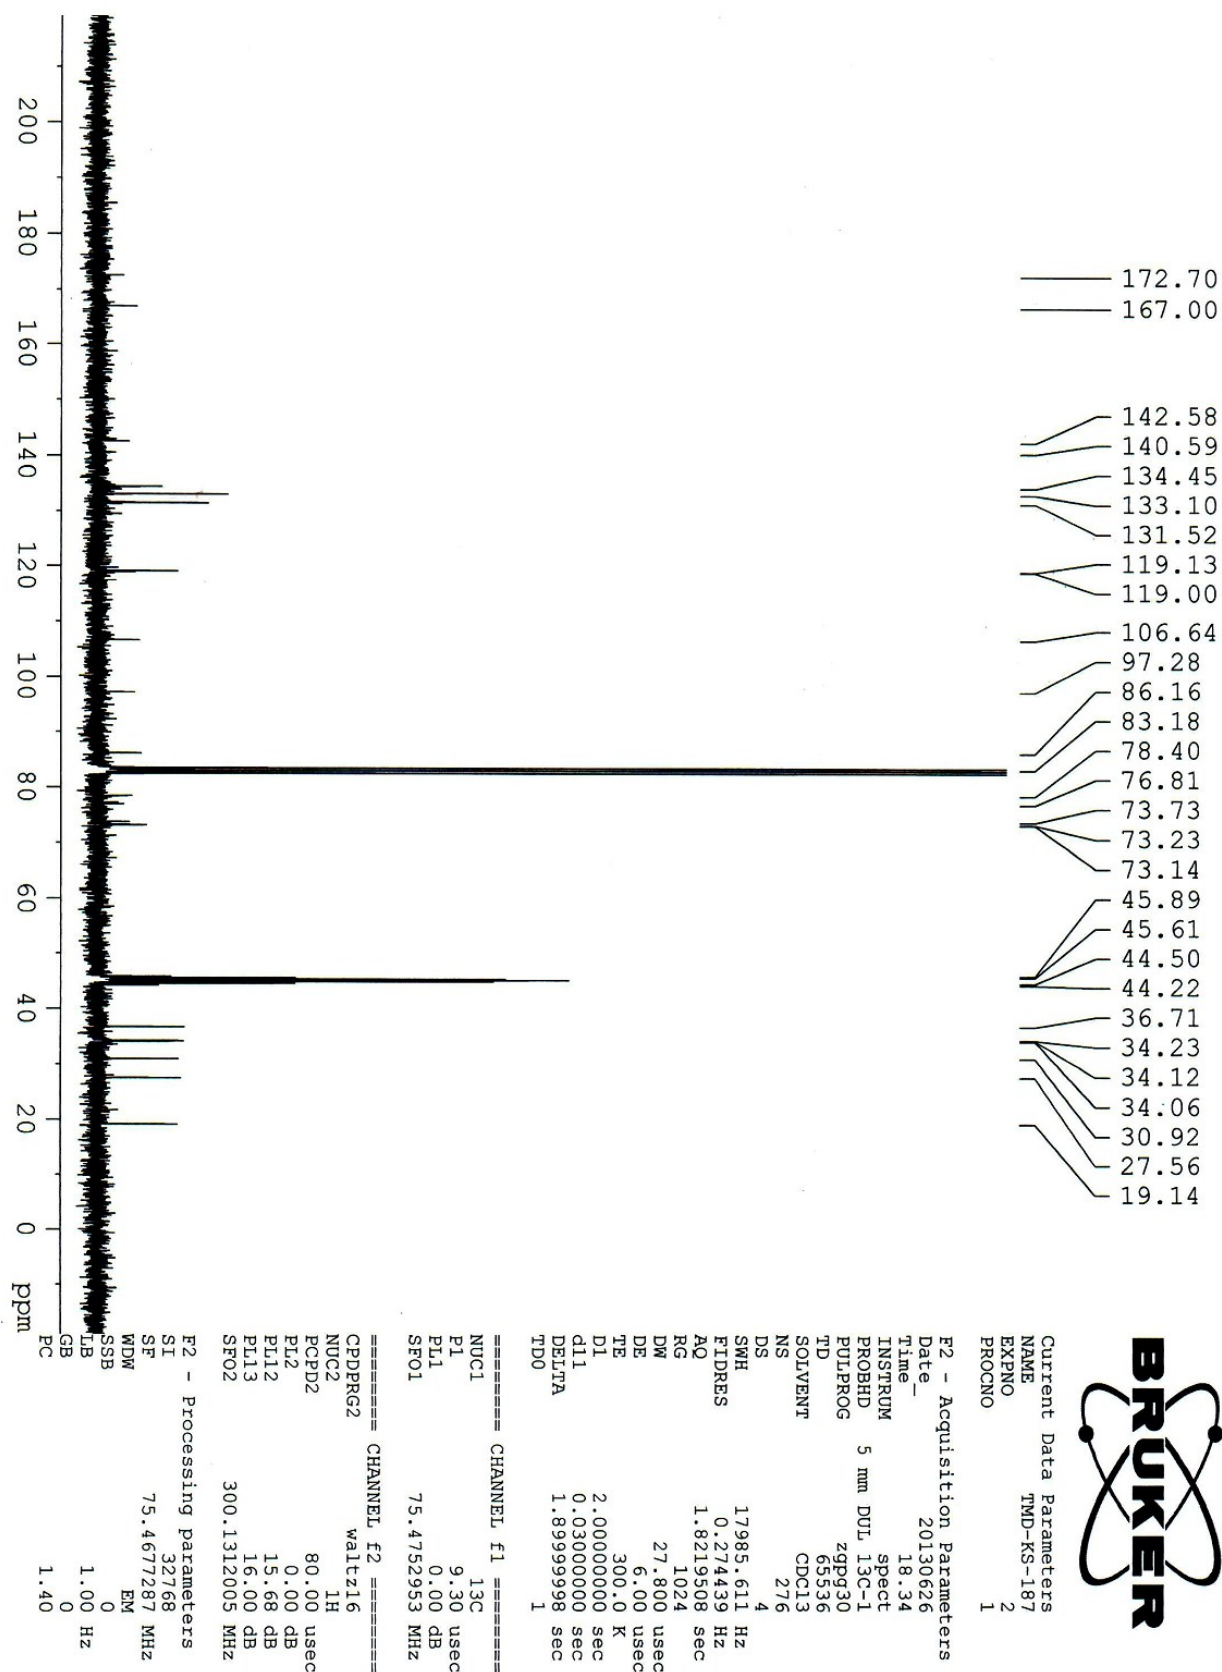

Fig. S.I.2.8:  $^{13}\text{C}$  NMR spectrum of compound 10



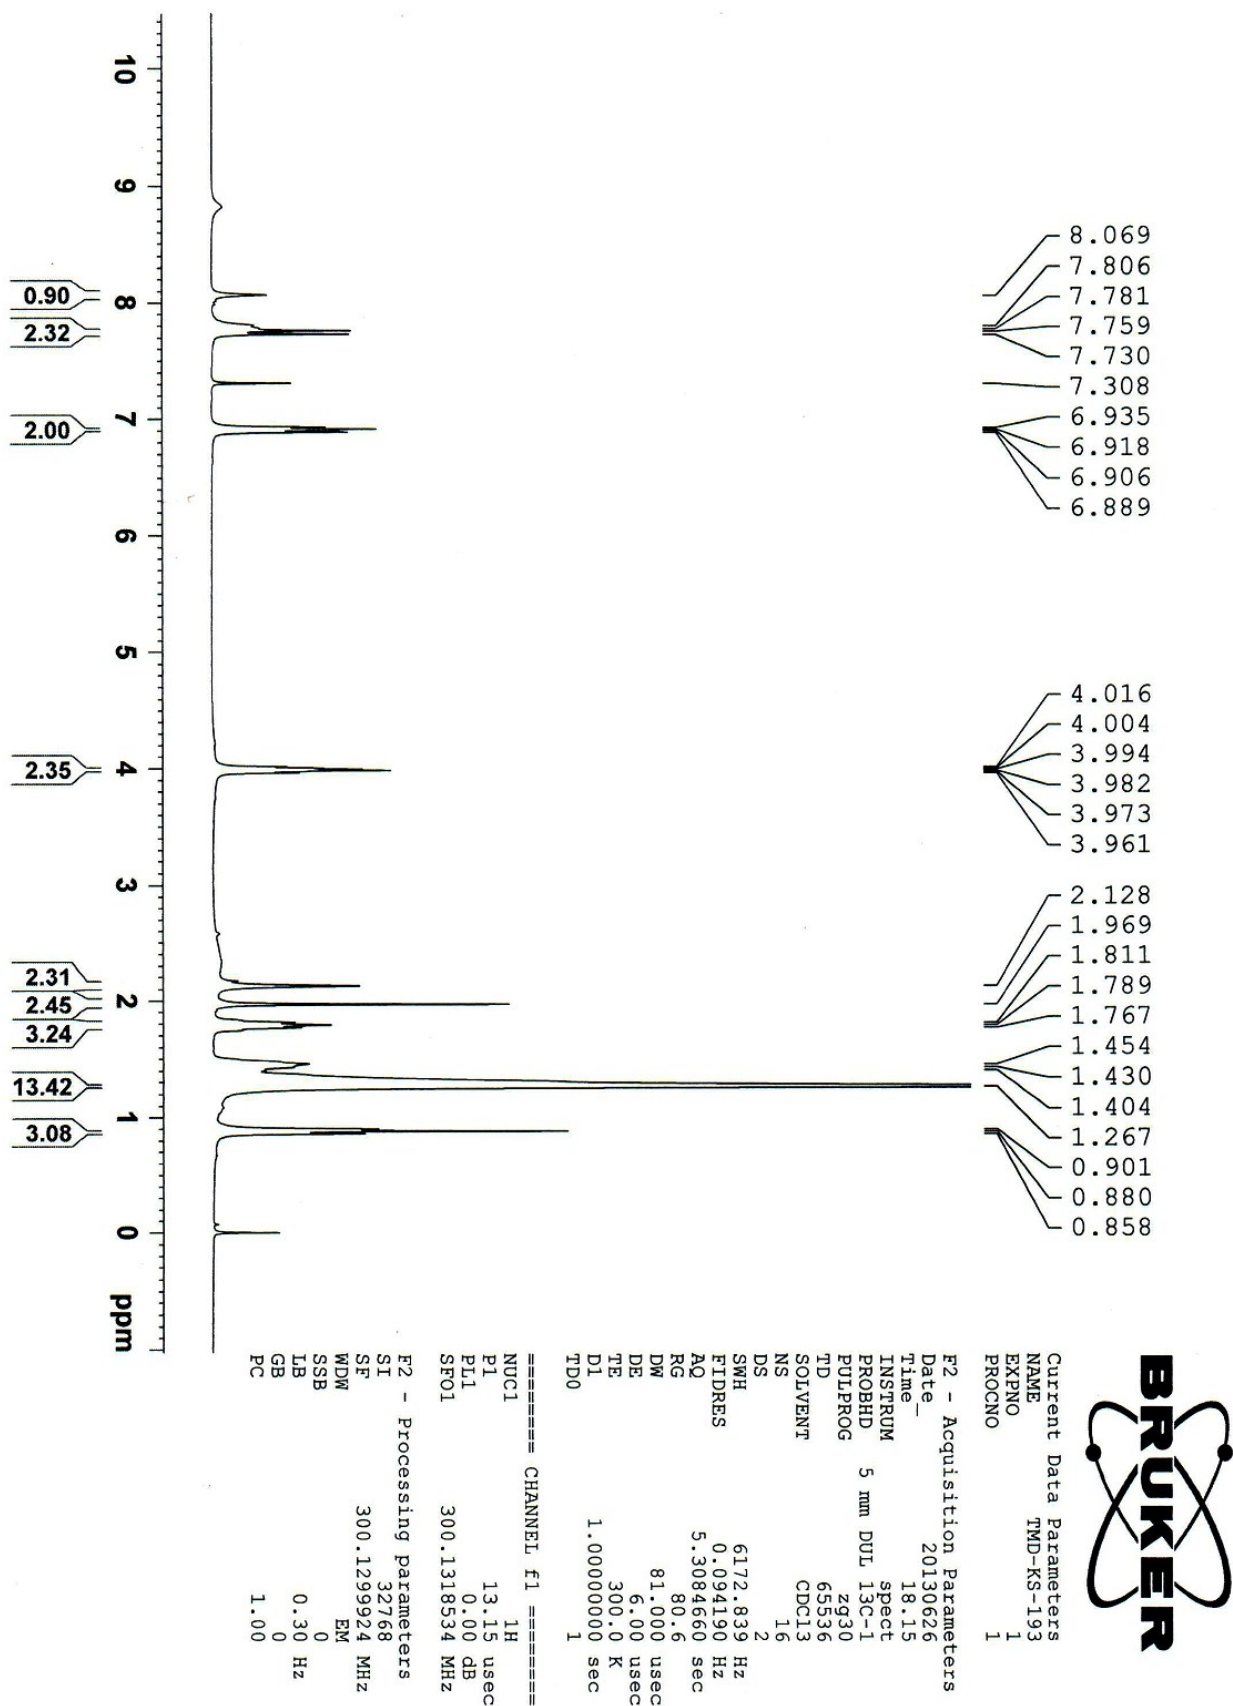

Fig. S.I.2.9: <sup>1</sup>H NMR spectrum of compound 2

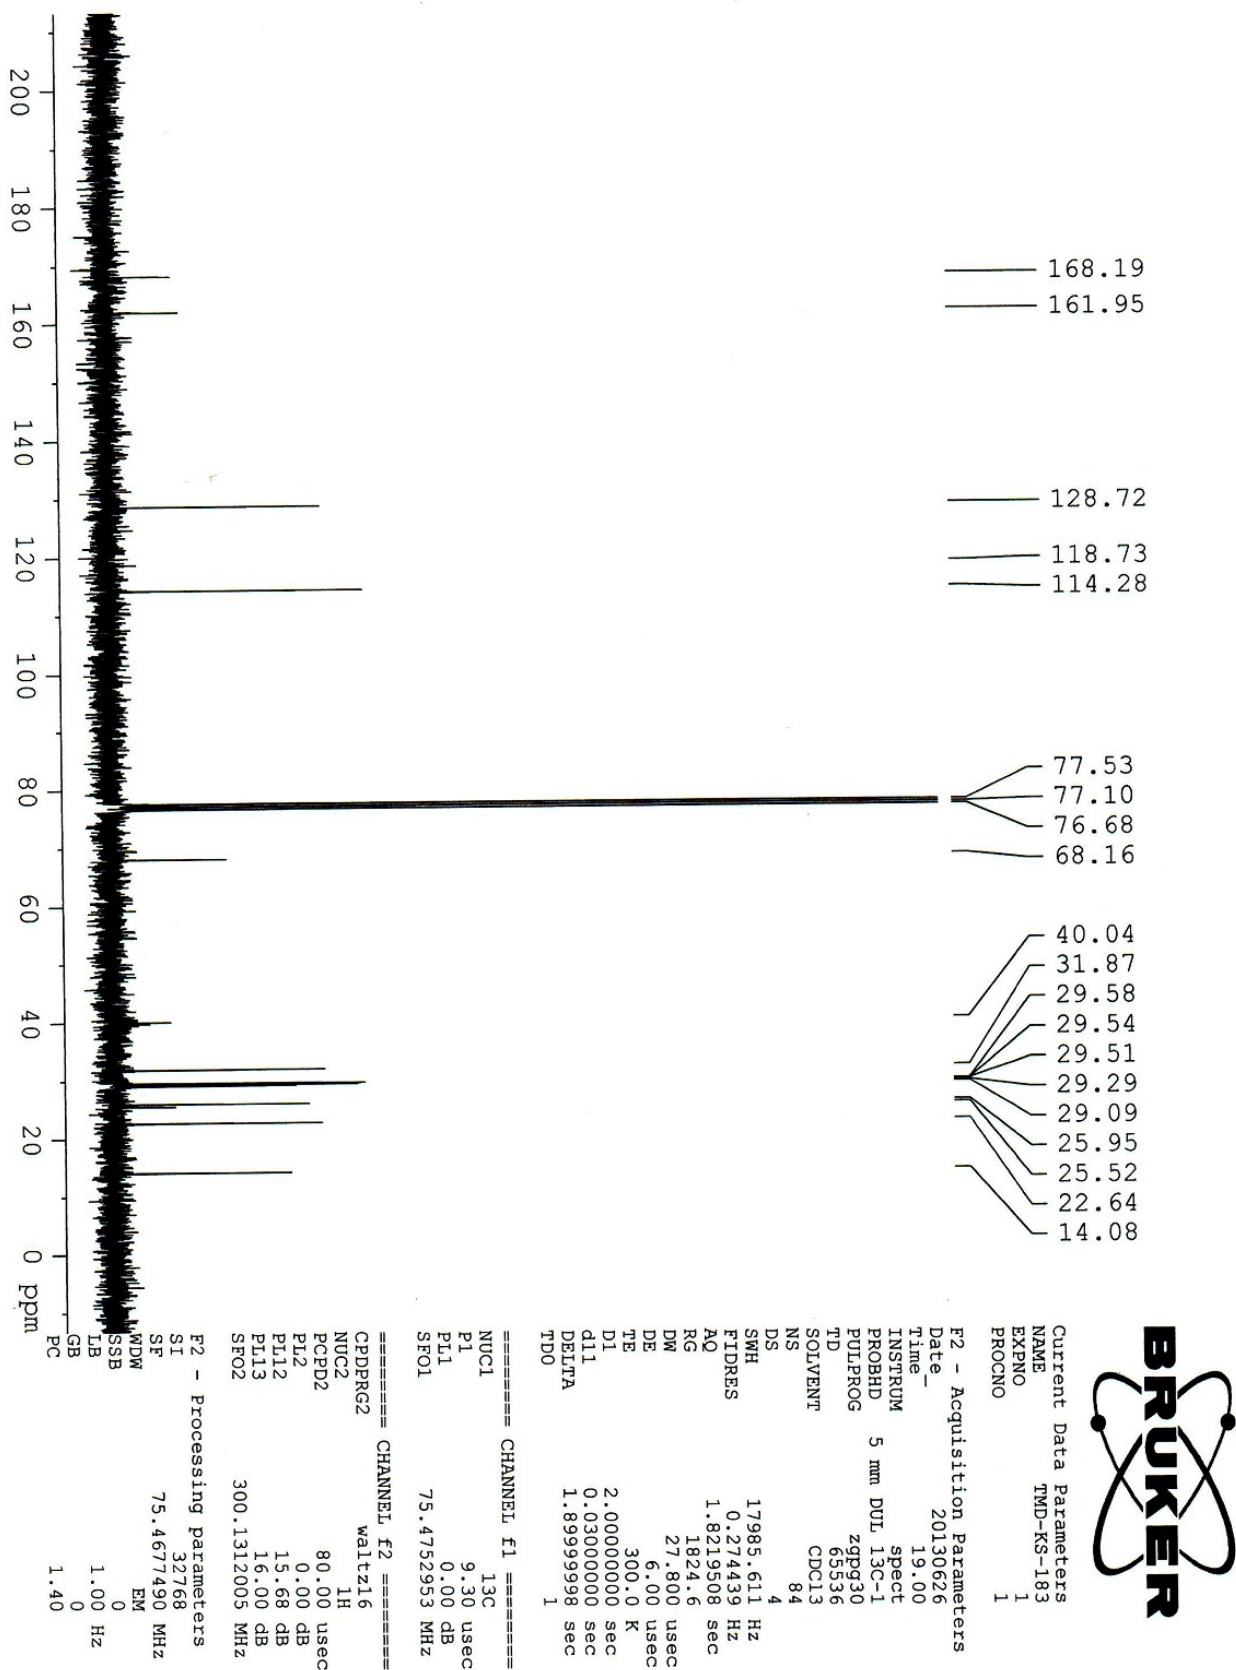

Fig. S.I.2.10:  $^{13}\text{C}$  NMR spectrum of compound 2

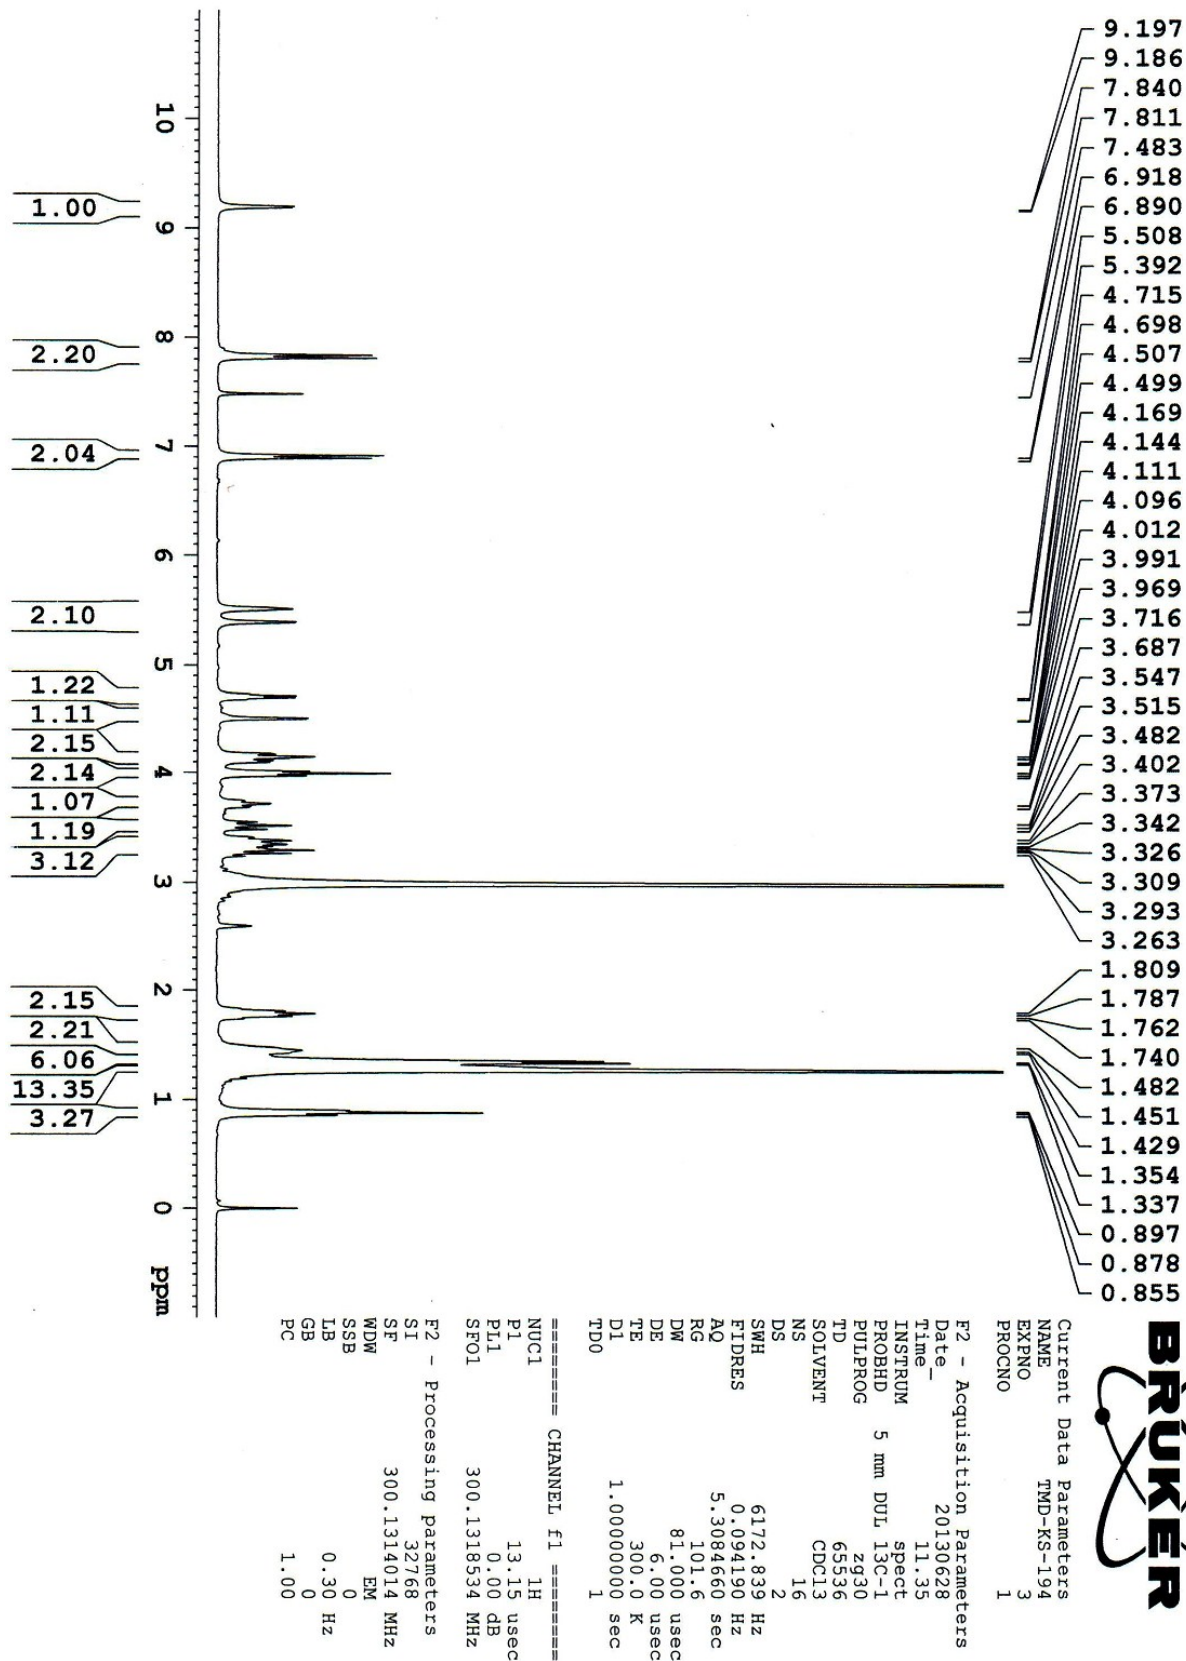Fig. S.I.2.11:  $^1\text{H}$  NMR spectrum of compound 11

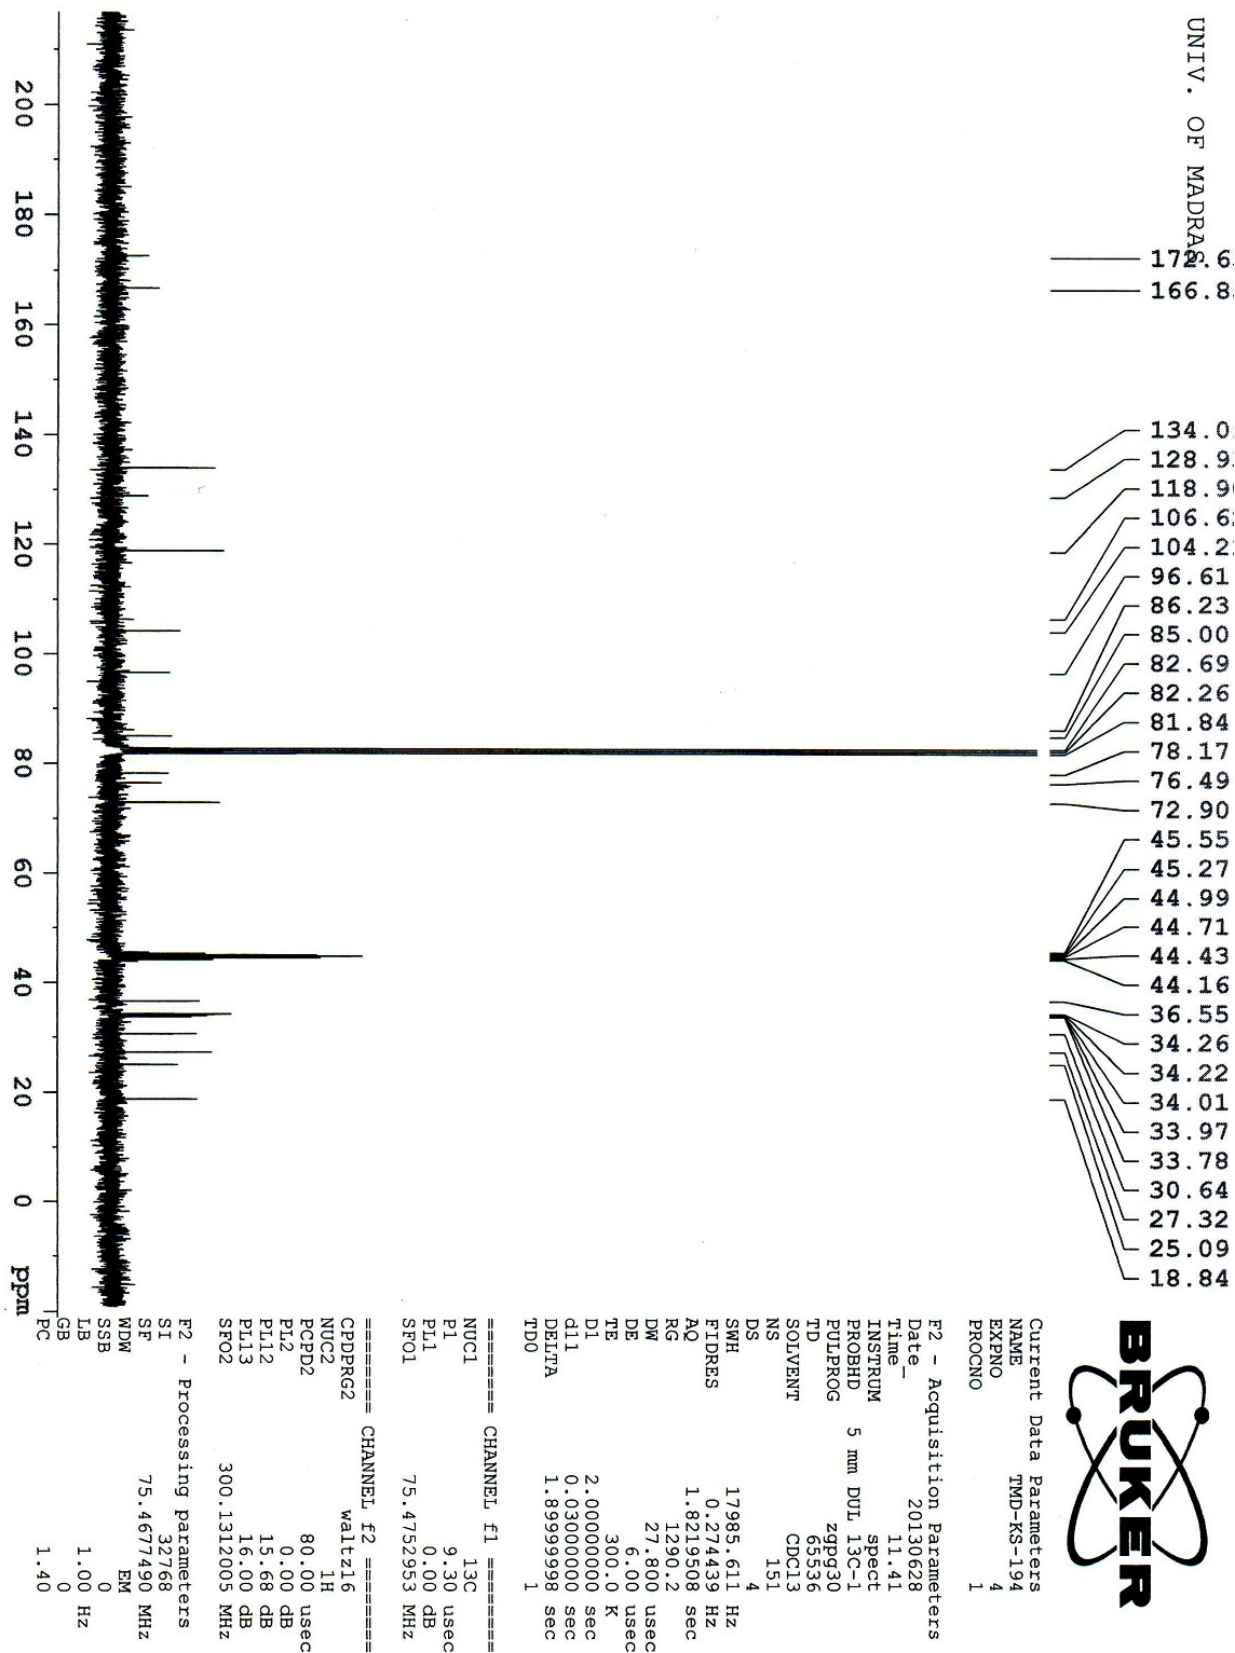

Fig. S.I.2.12:  $^{13}\text{C}$  NMR spectrum of compound 11



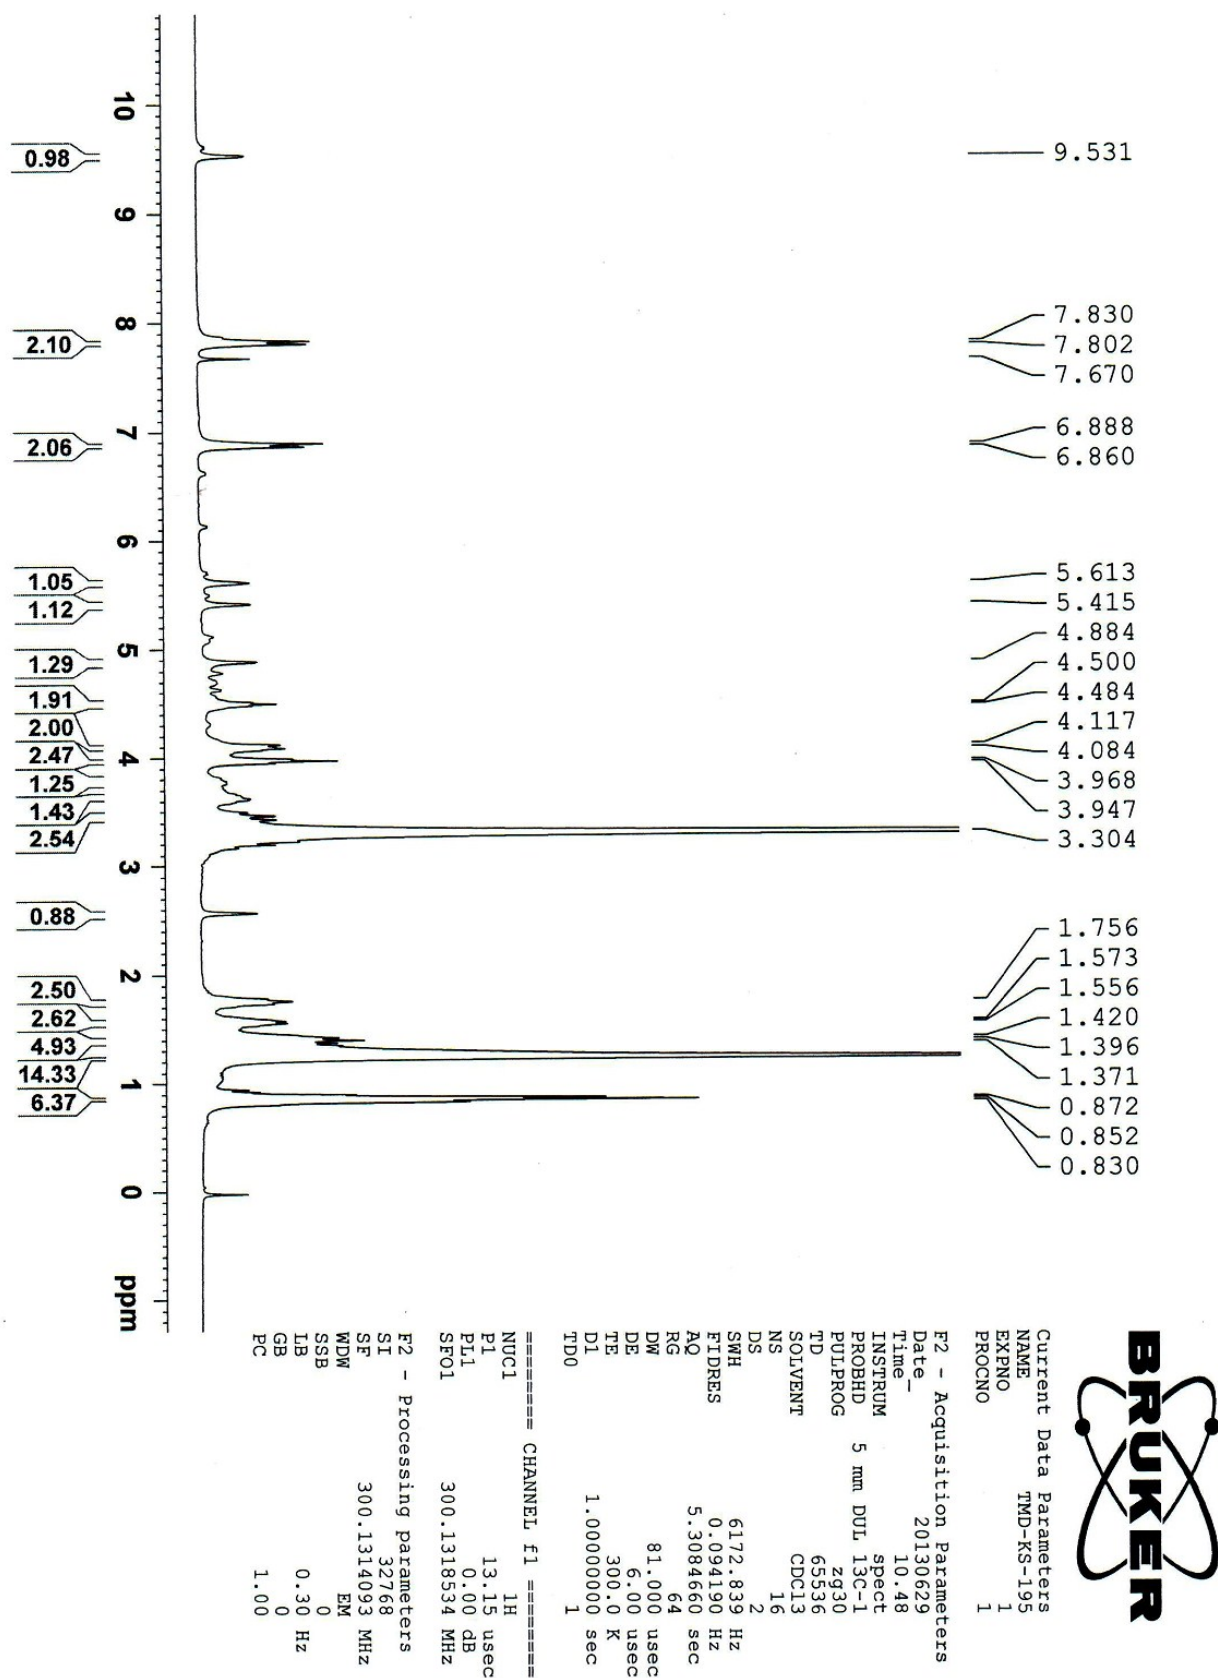

Fig. S.I.2.13:  $^1\text{H}$  NMR spectrum of compound **12**

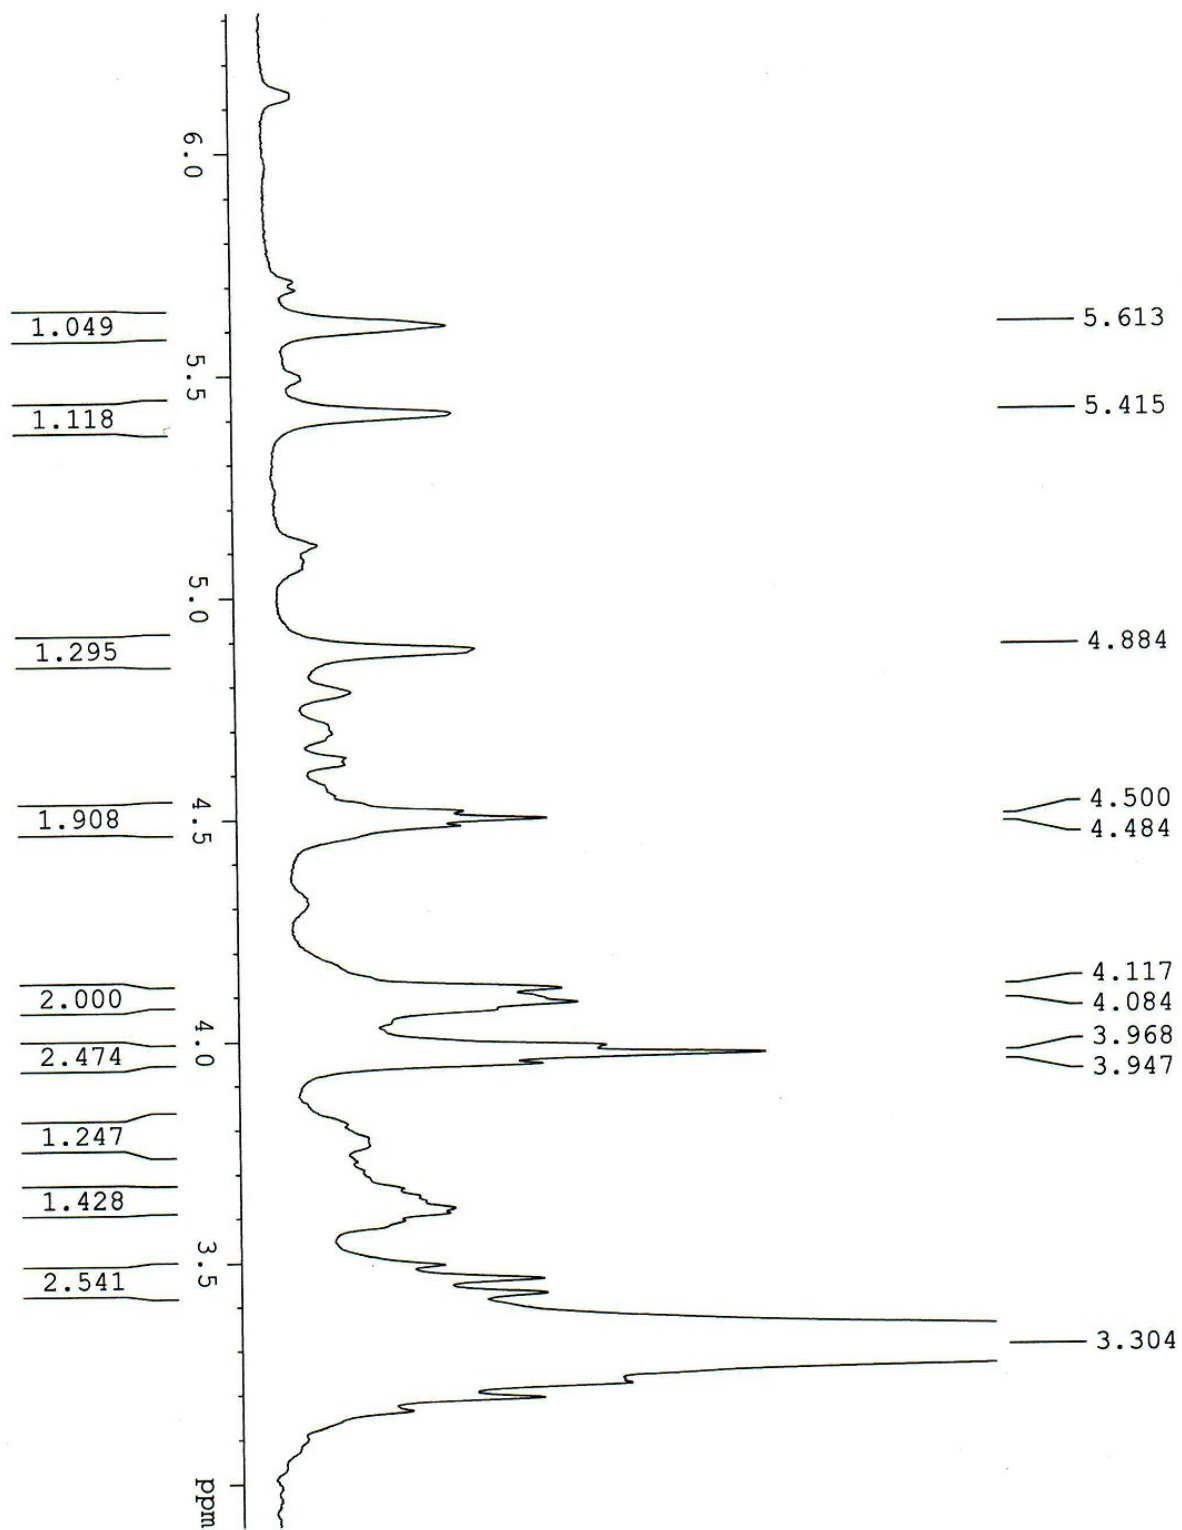

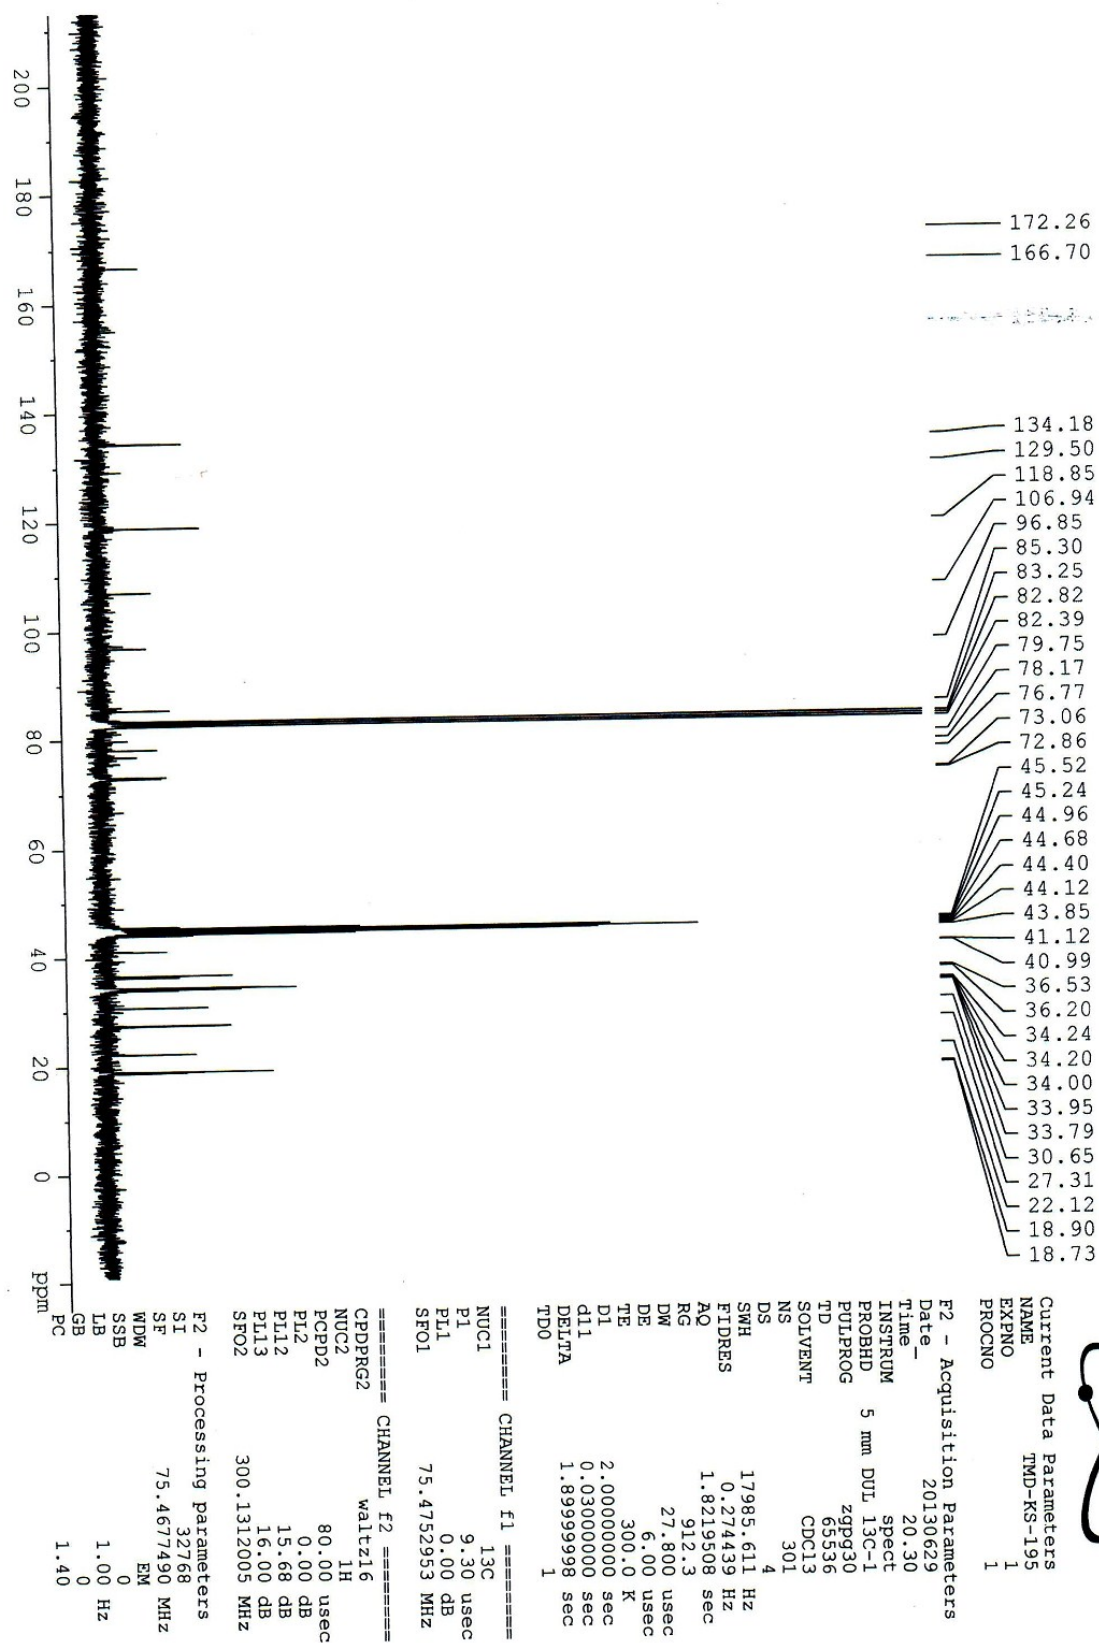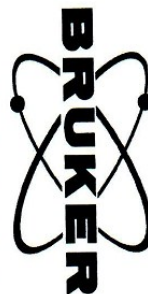

Fig. S.I.2.14:  $^{13}\text{C}$  NMR spectrum of compound 12

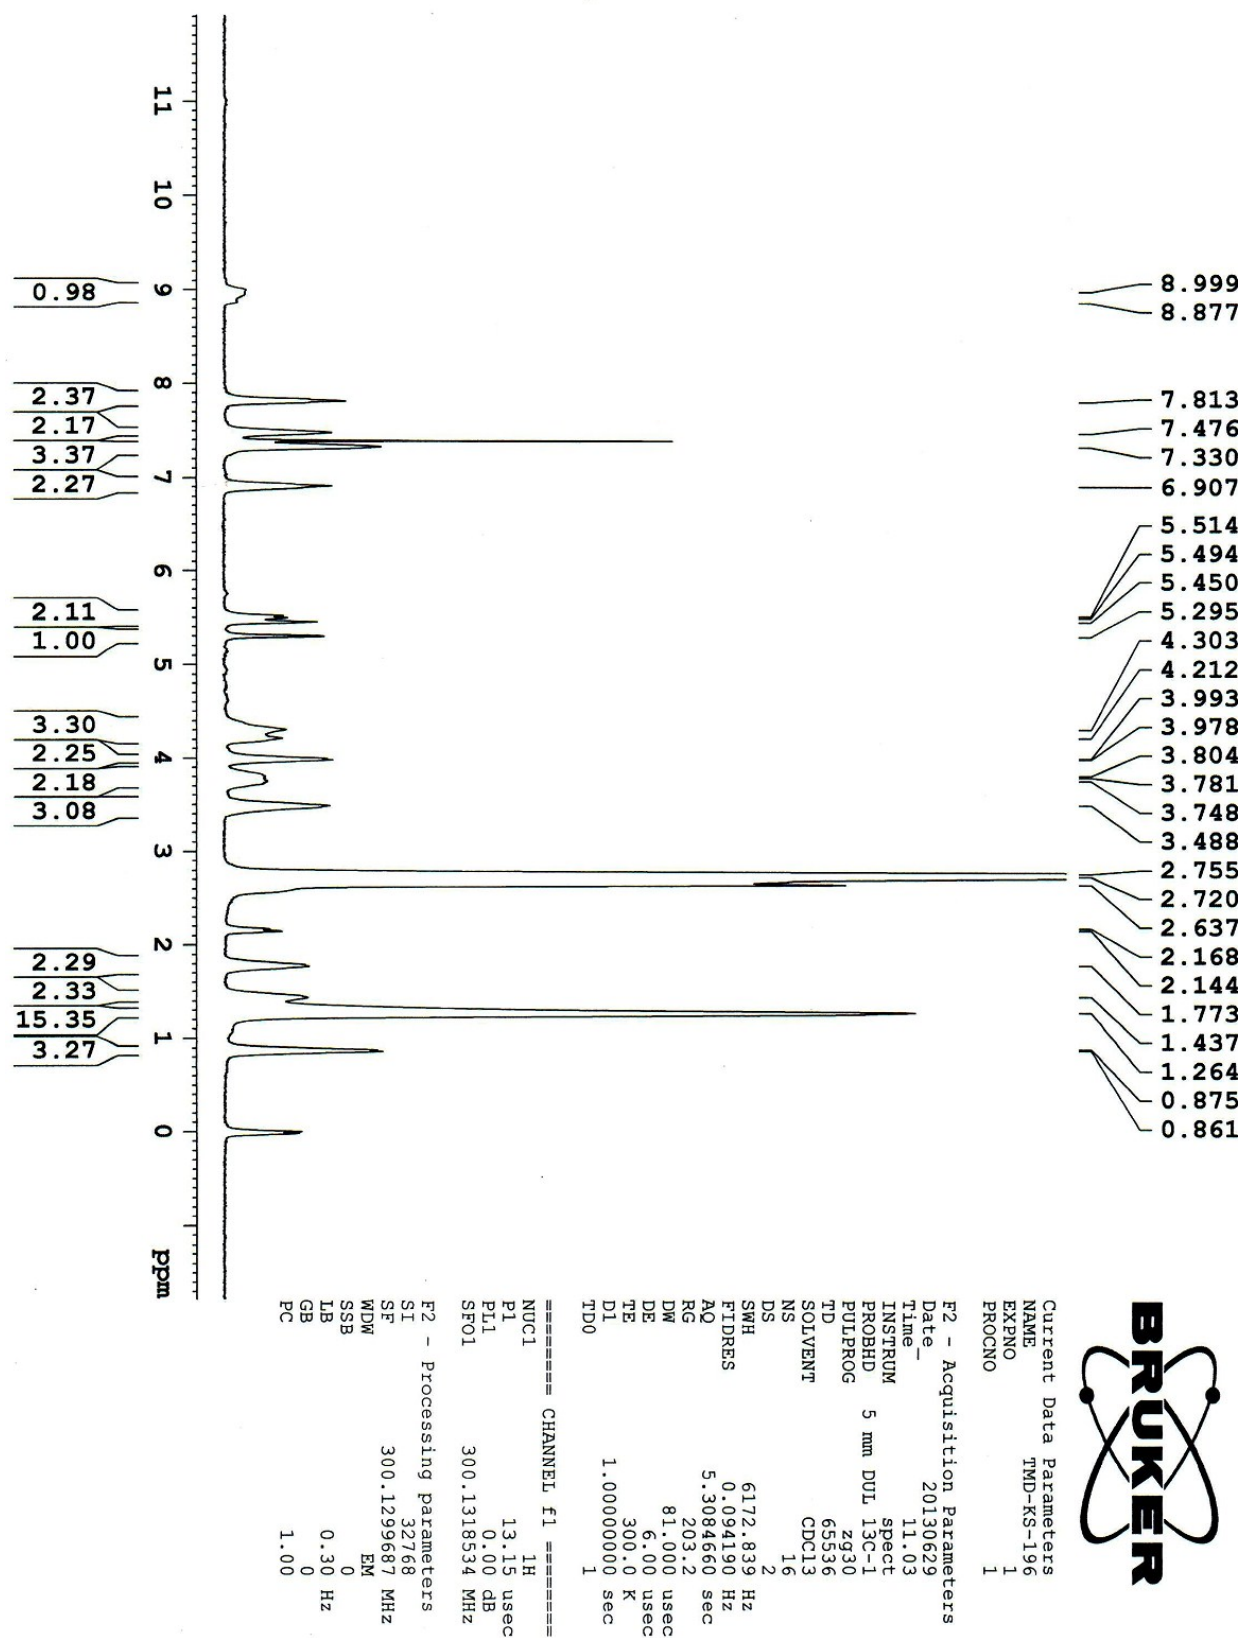

Fig. S.I.2.15:  $^1\text{H}$  NMR spectrum of compound 13



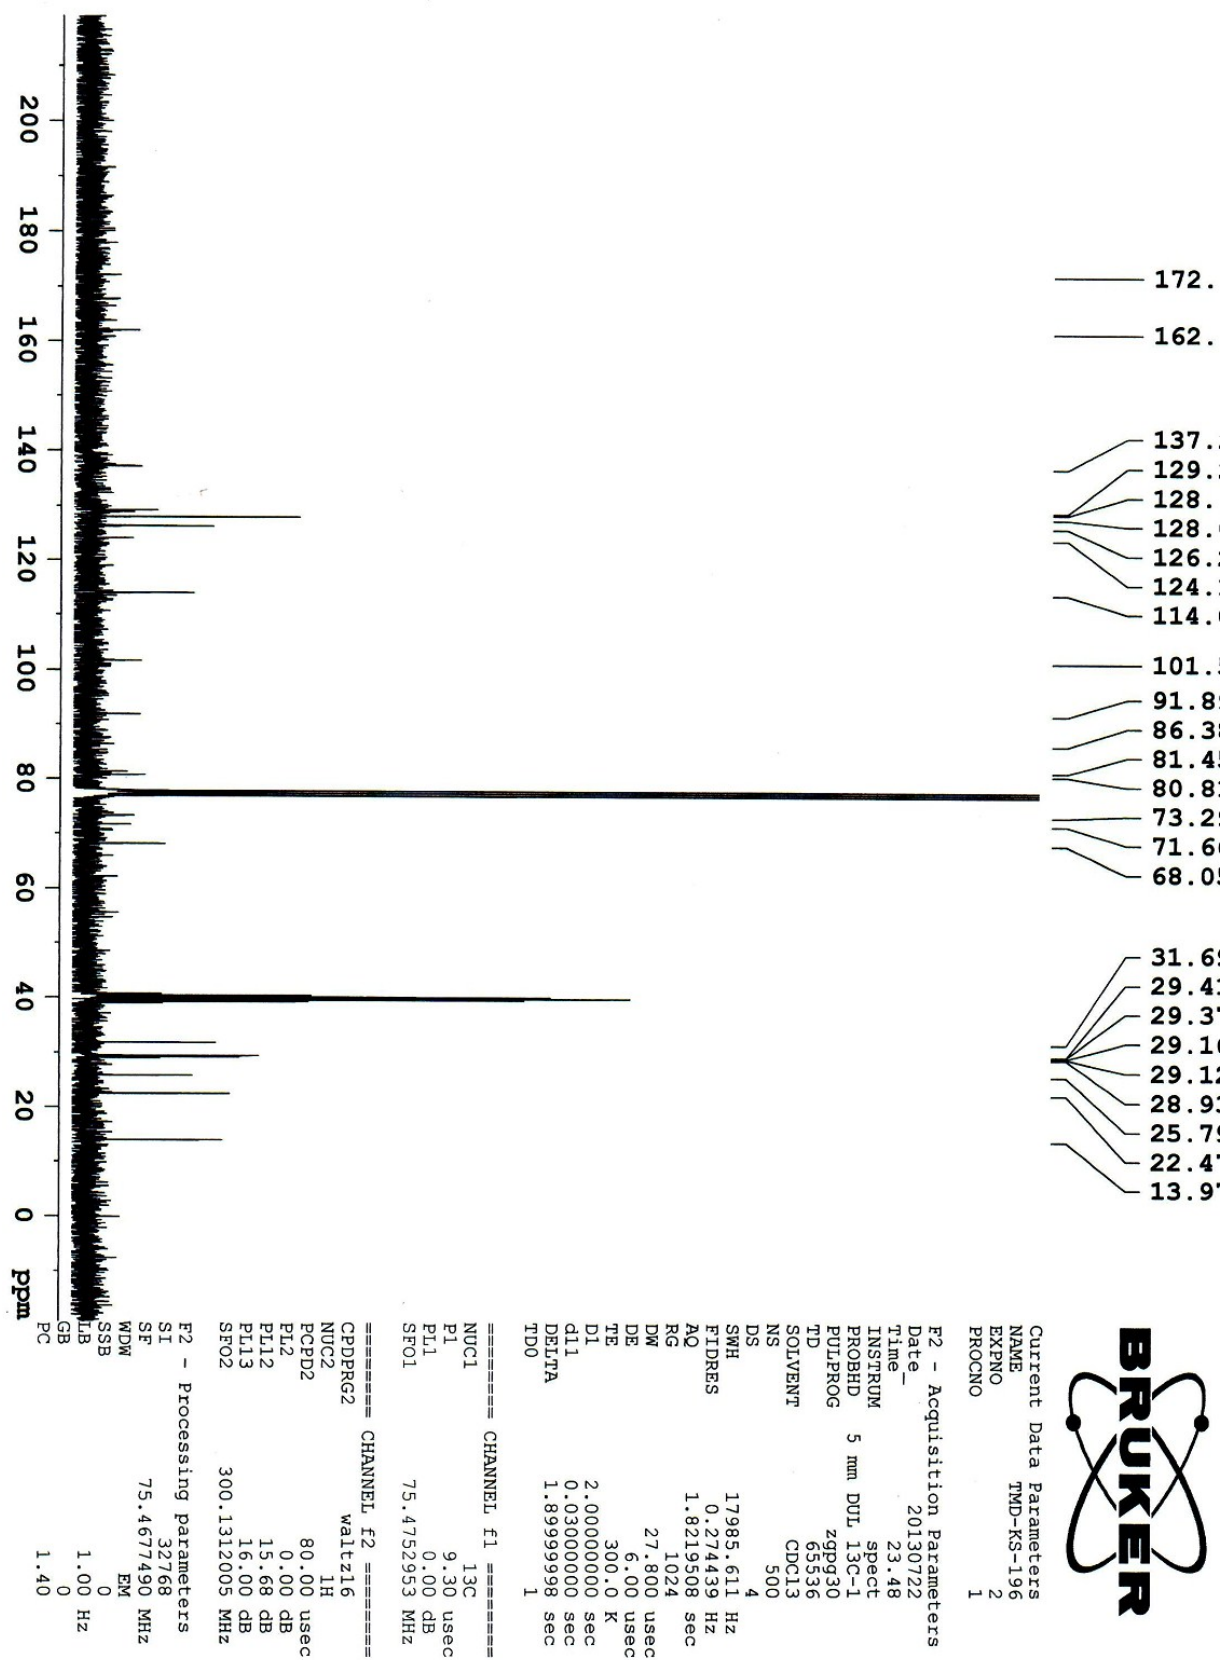

Fig. S.I.2.16:  $^{13}\text{C}$  NMR spectrum of compound 13

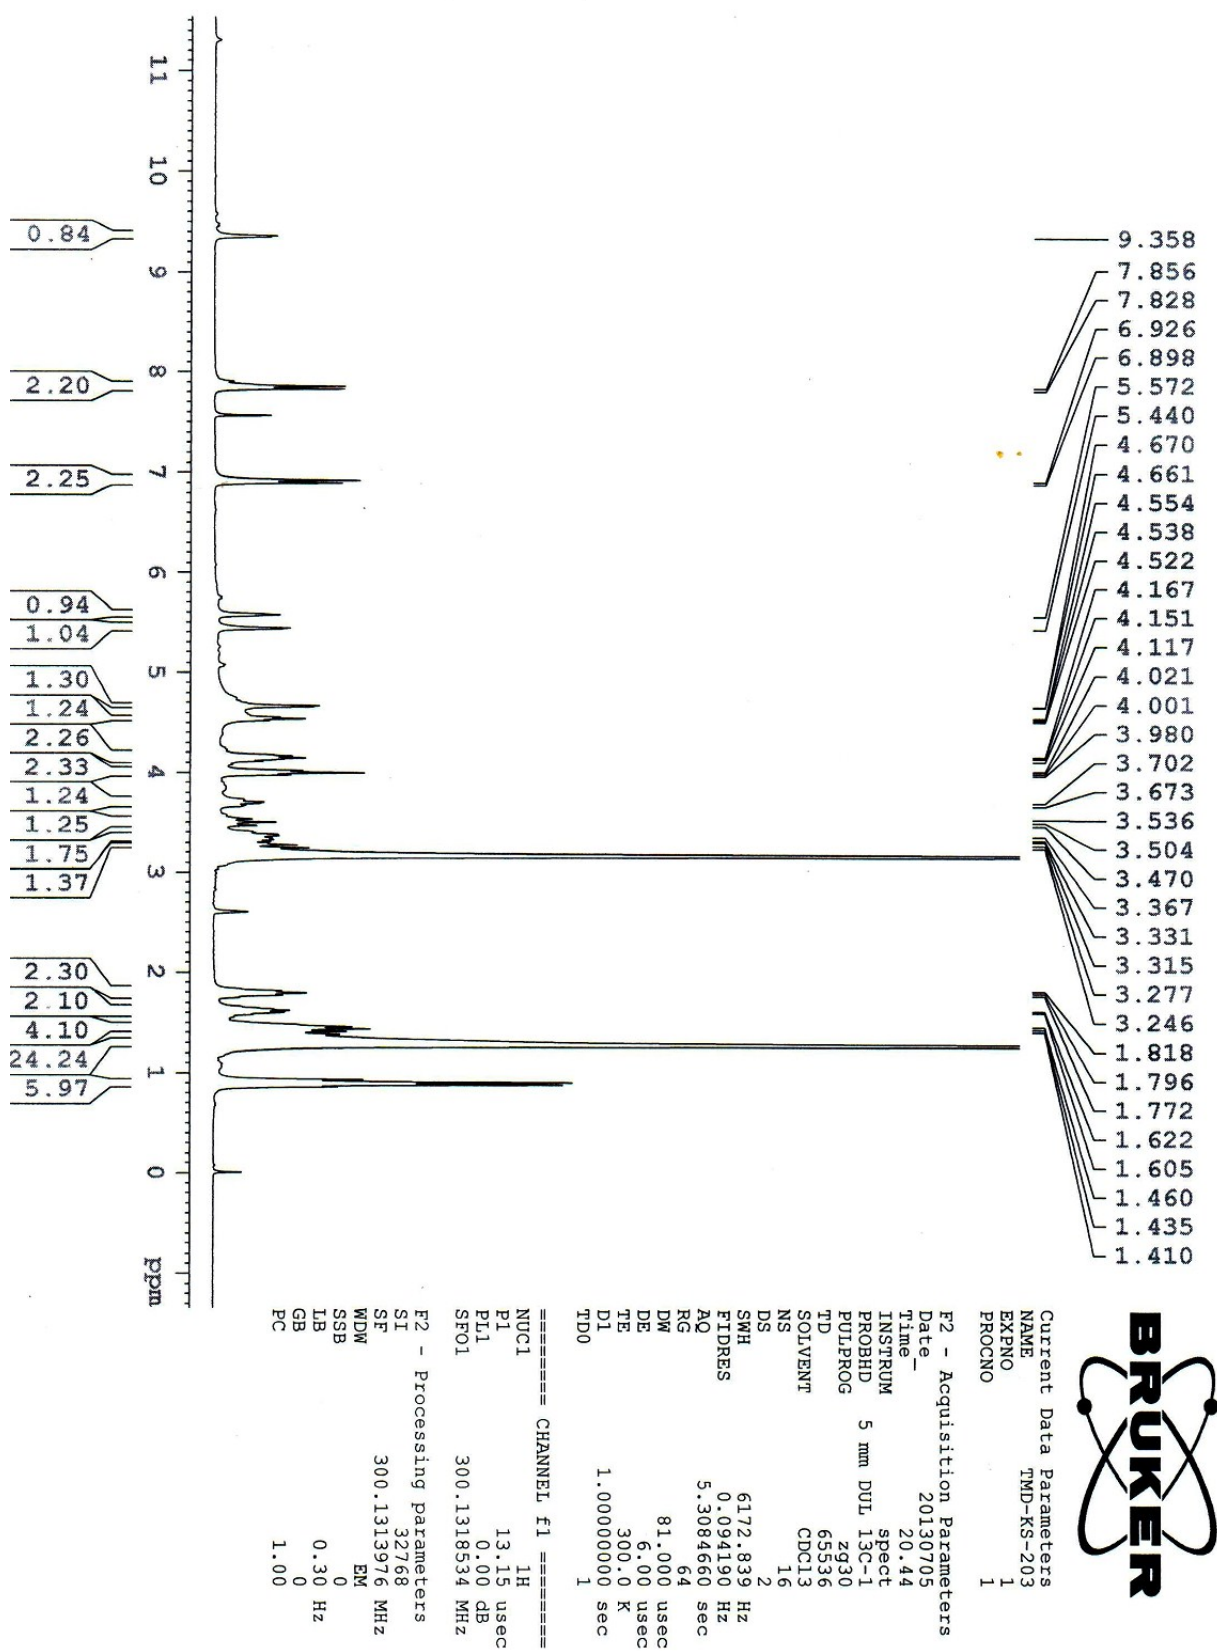

Fig. S.I.2.17:  $^1\text{H}$  NMR spectrum of compound 14

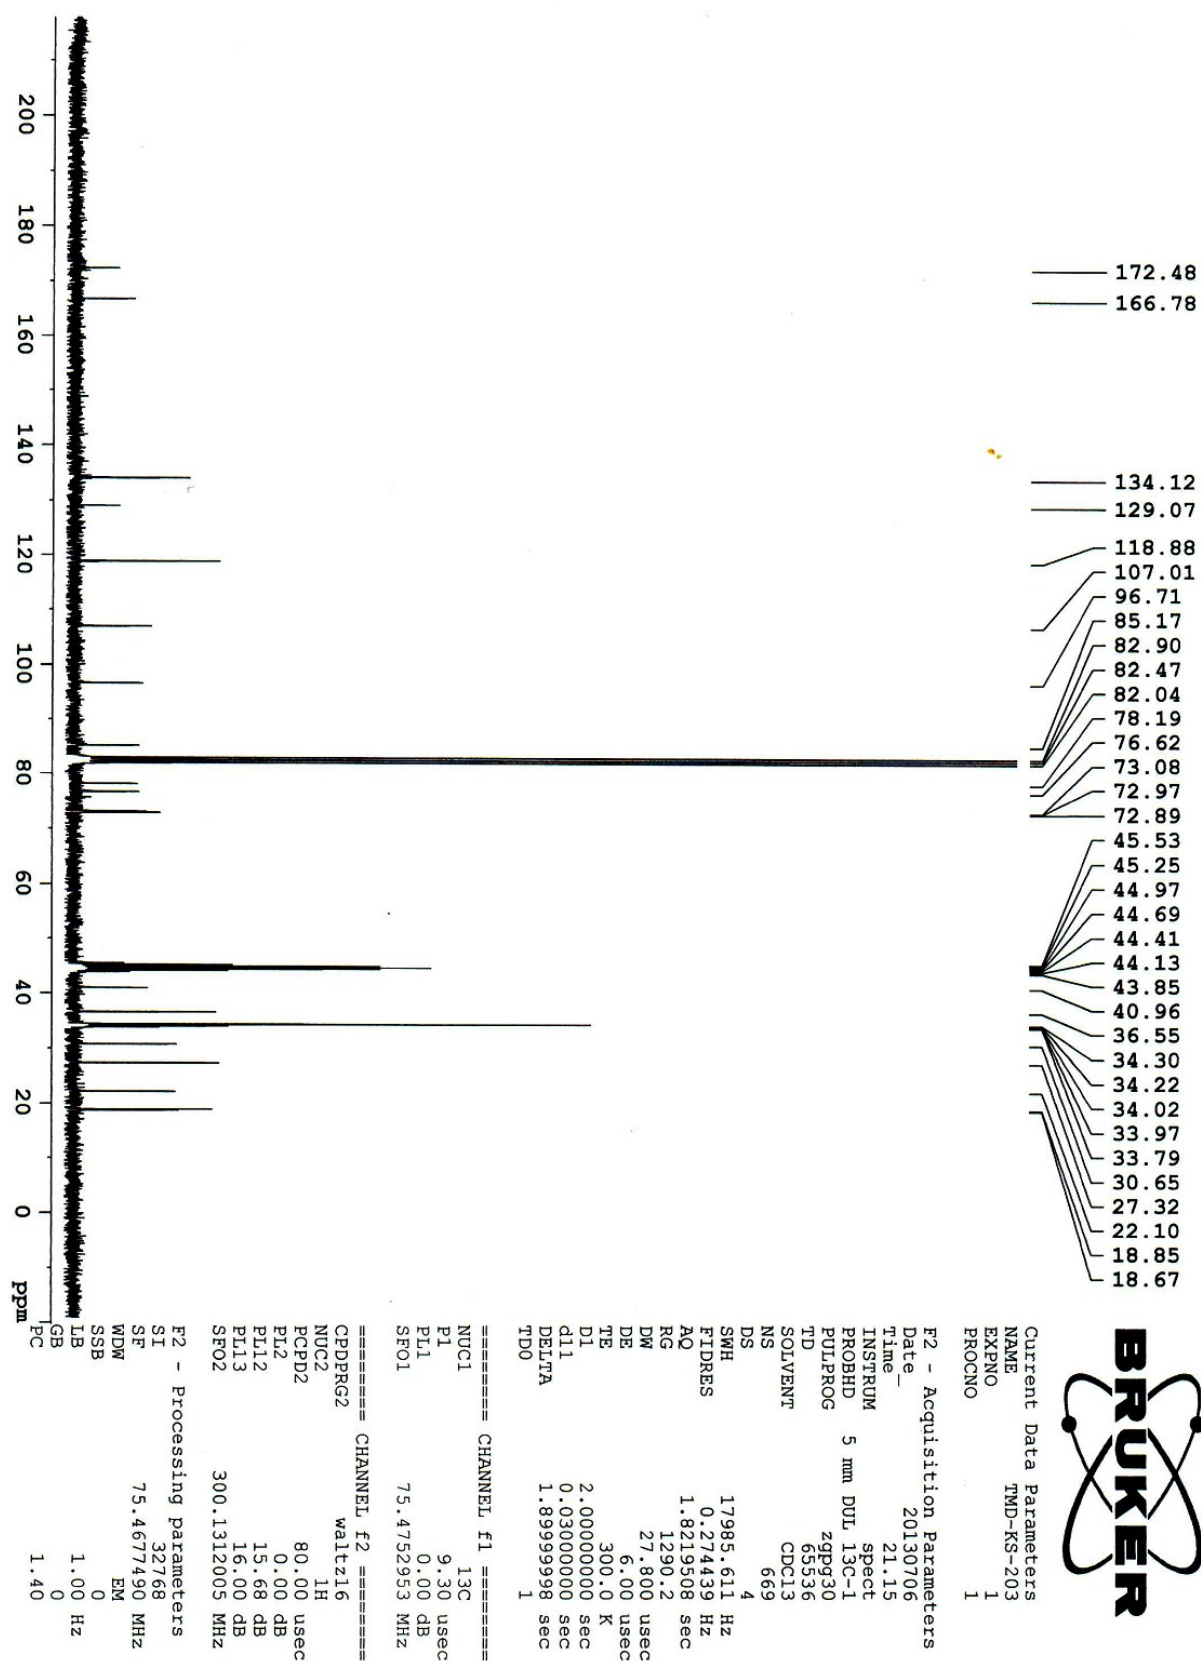

Fig. S.I.2.18:  $^{13}\text{C}$  NMR spectrum of compound 14

Fig. S.I.2.6:  $^1\text{H}$ -NMR spectrum of compound 13

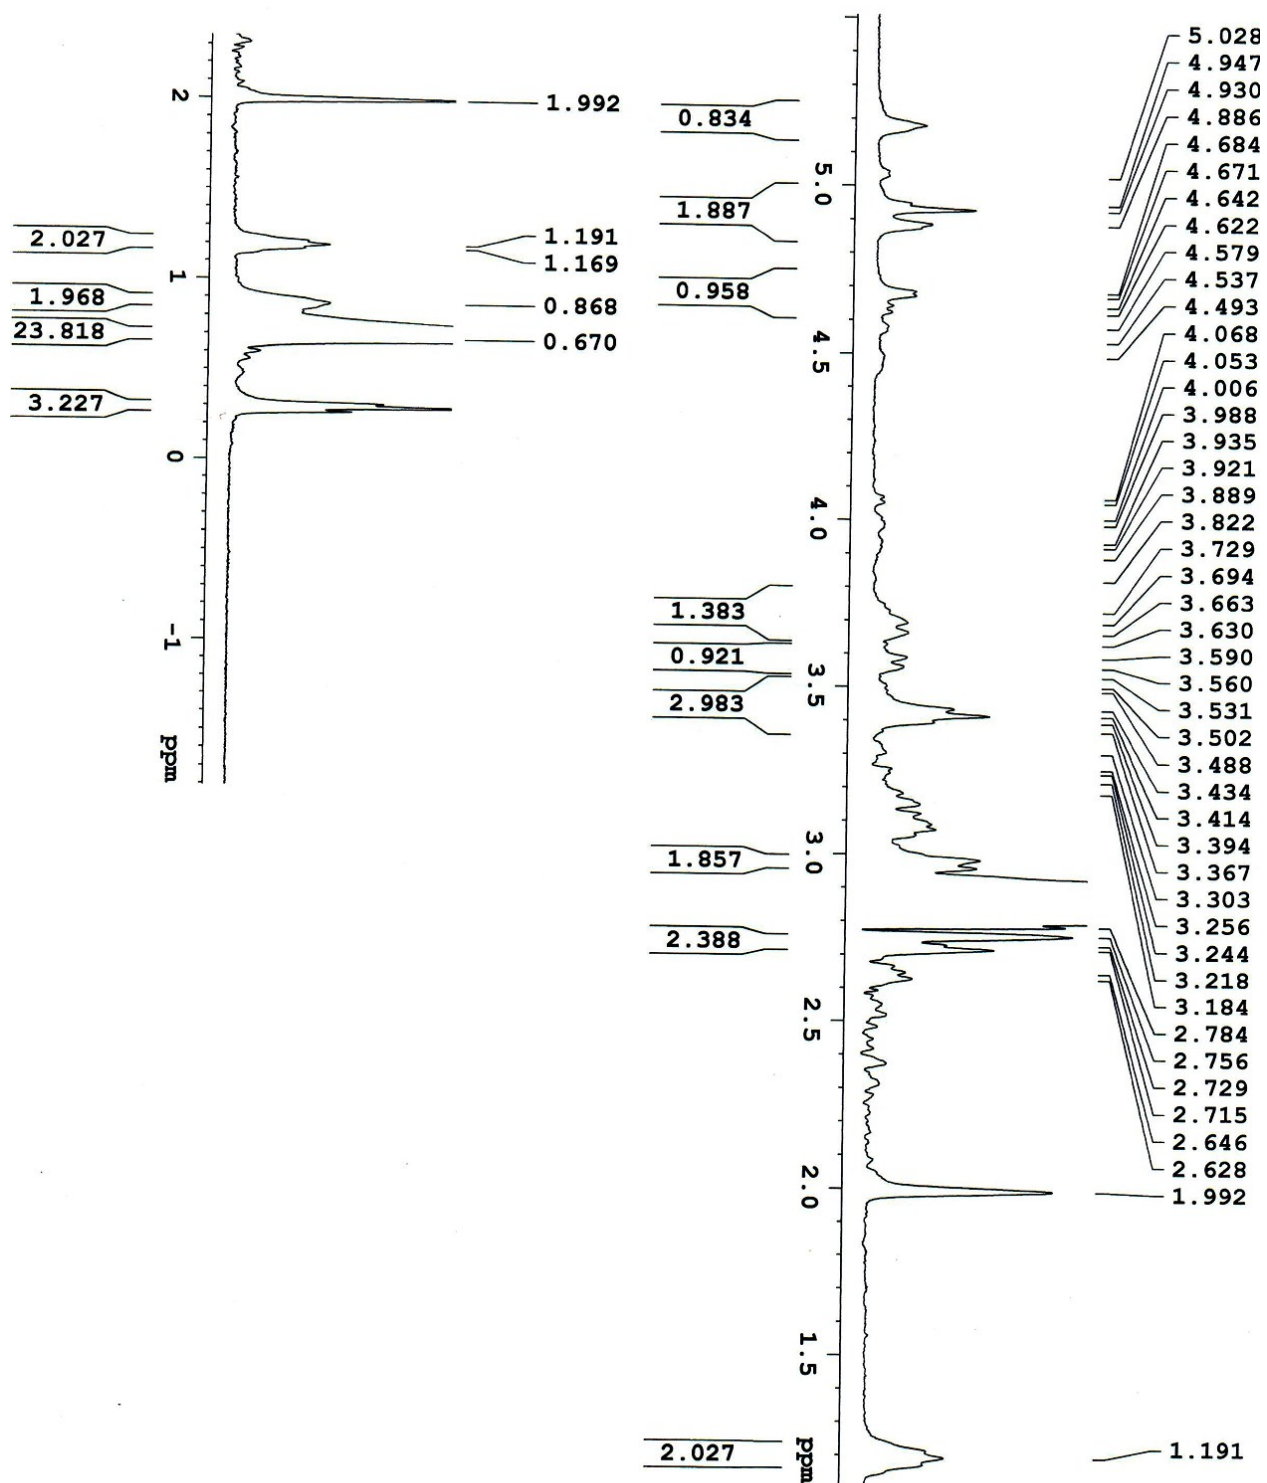



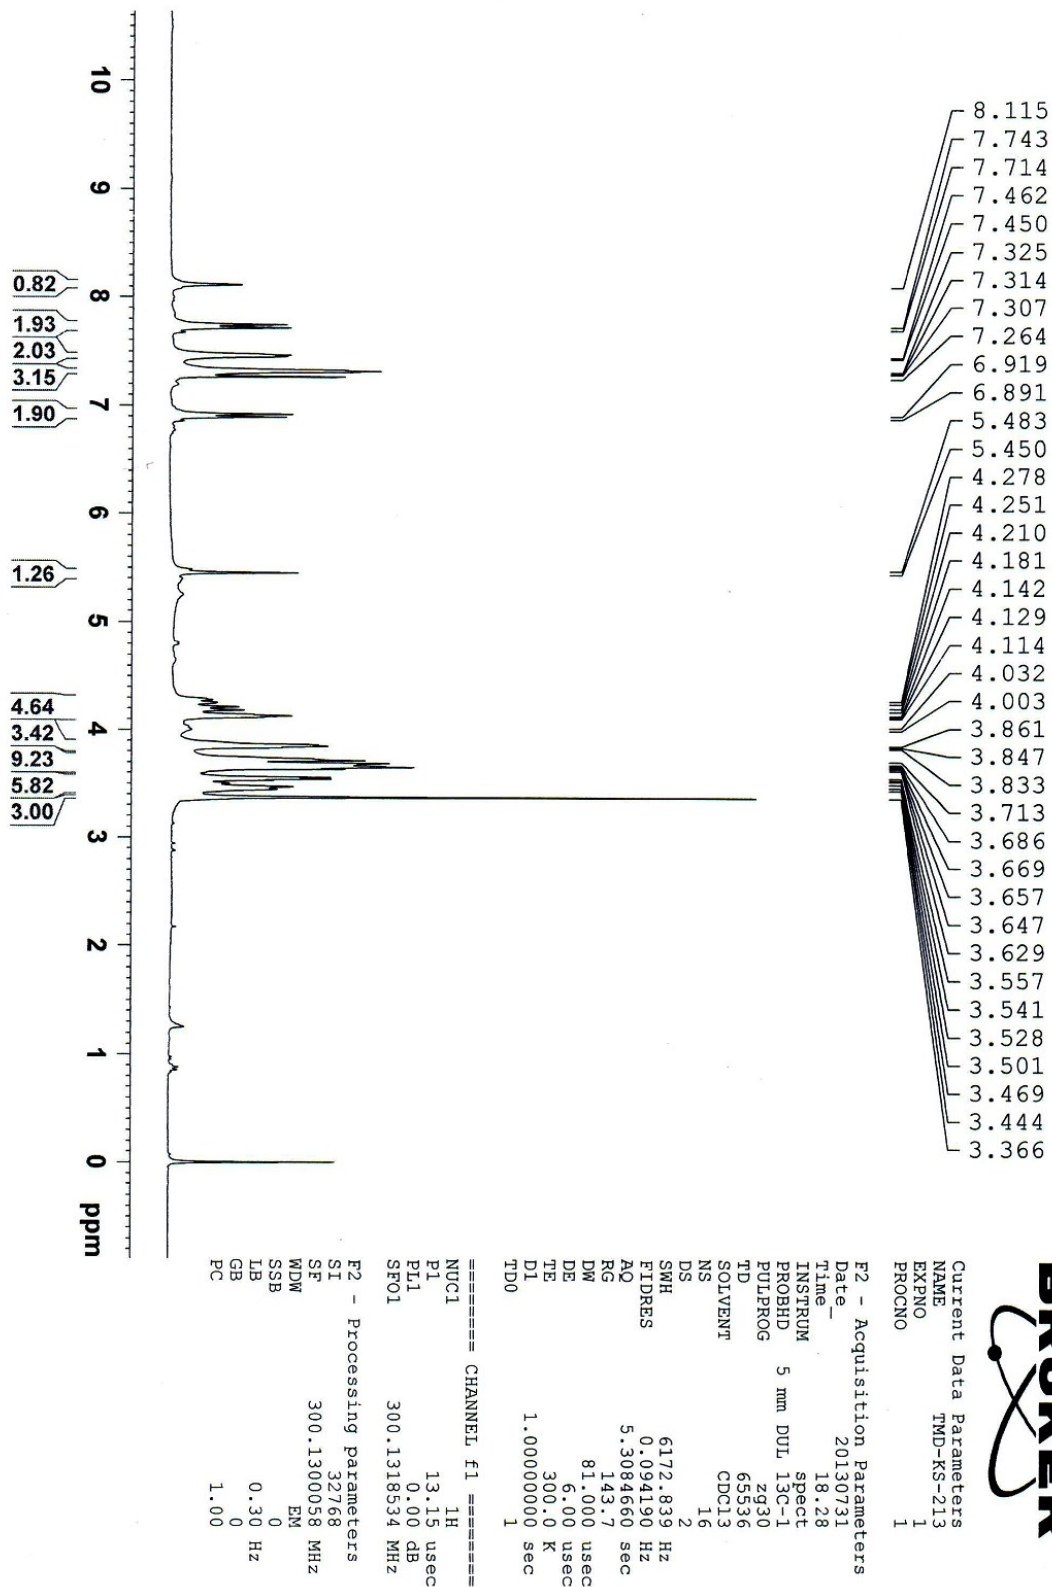

Fig. S.I.2.19: <sup>1</sup>H NMR spectrum of compound 15

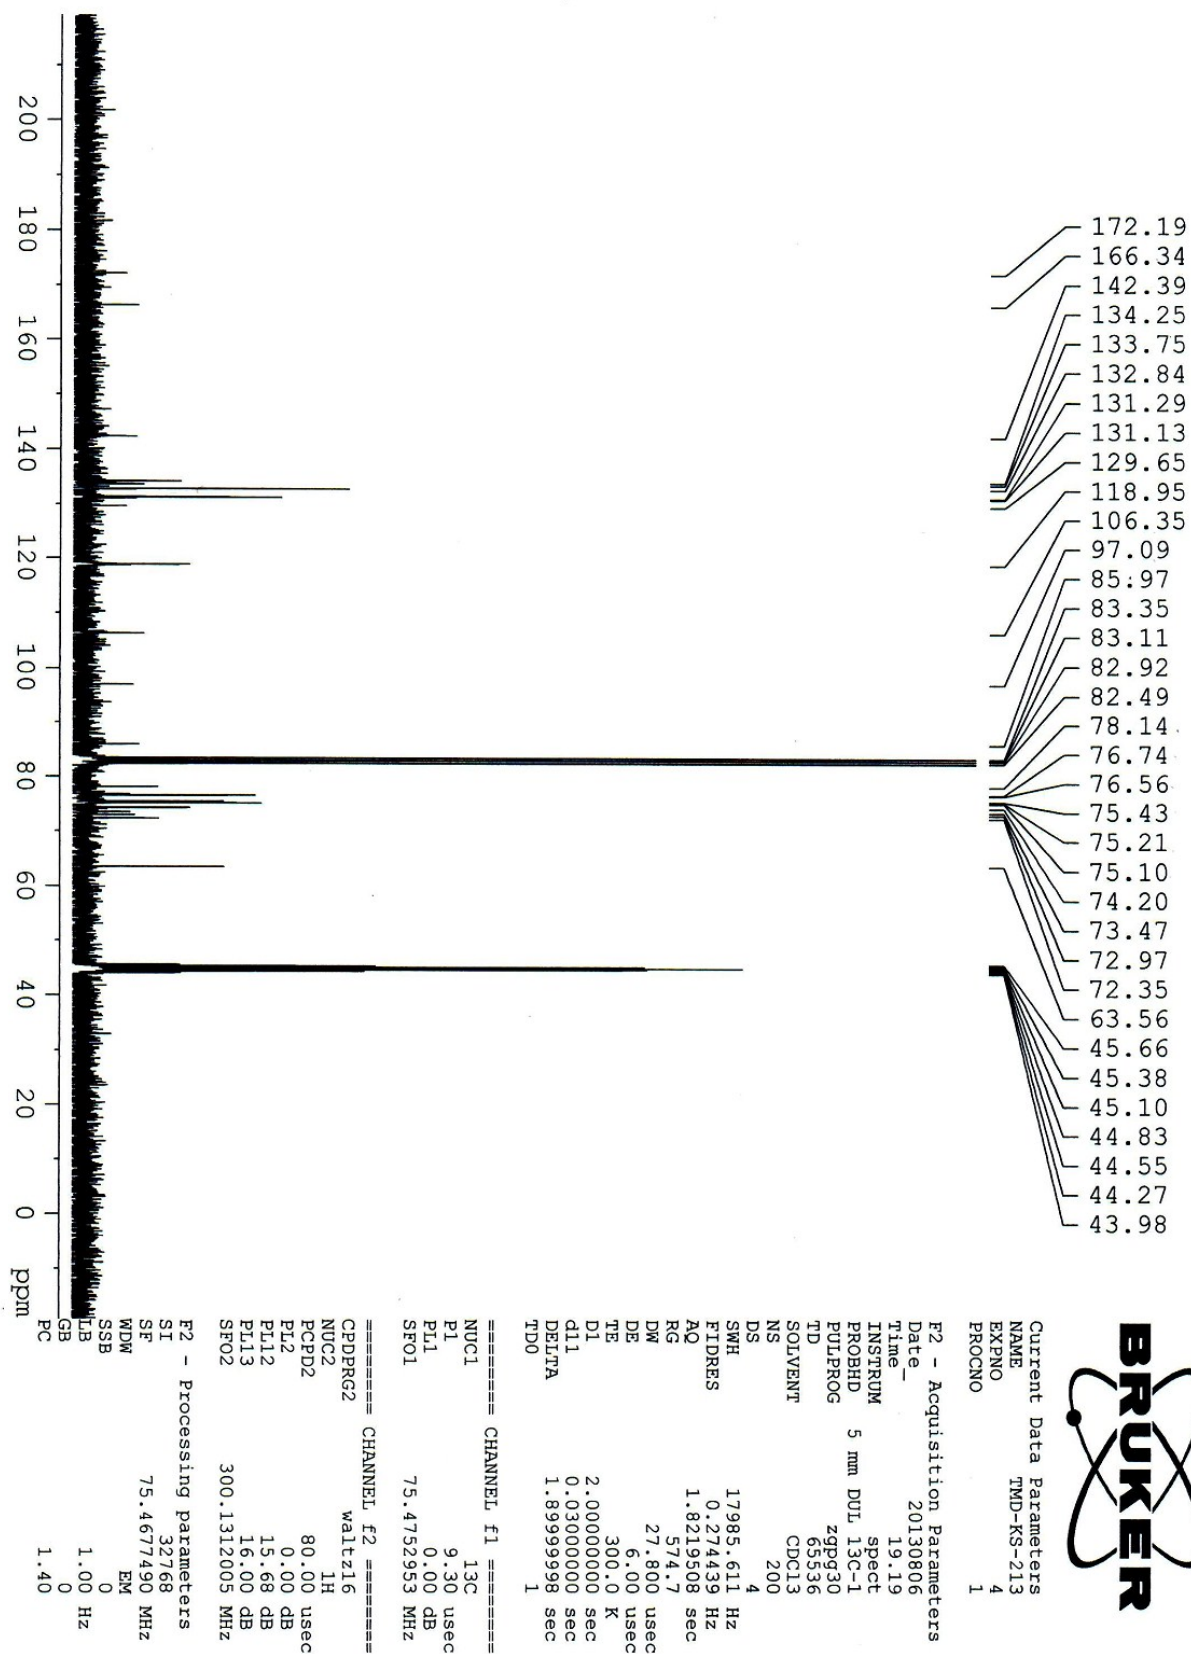

Fig. S.I.2.20:  $^{13}\text{C}$  NMR spectrum of compound 15

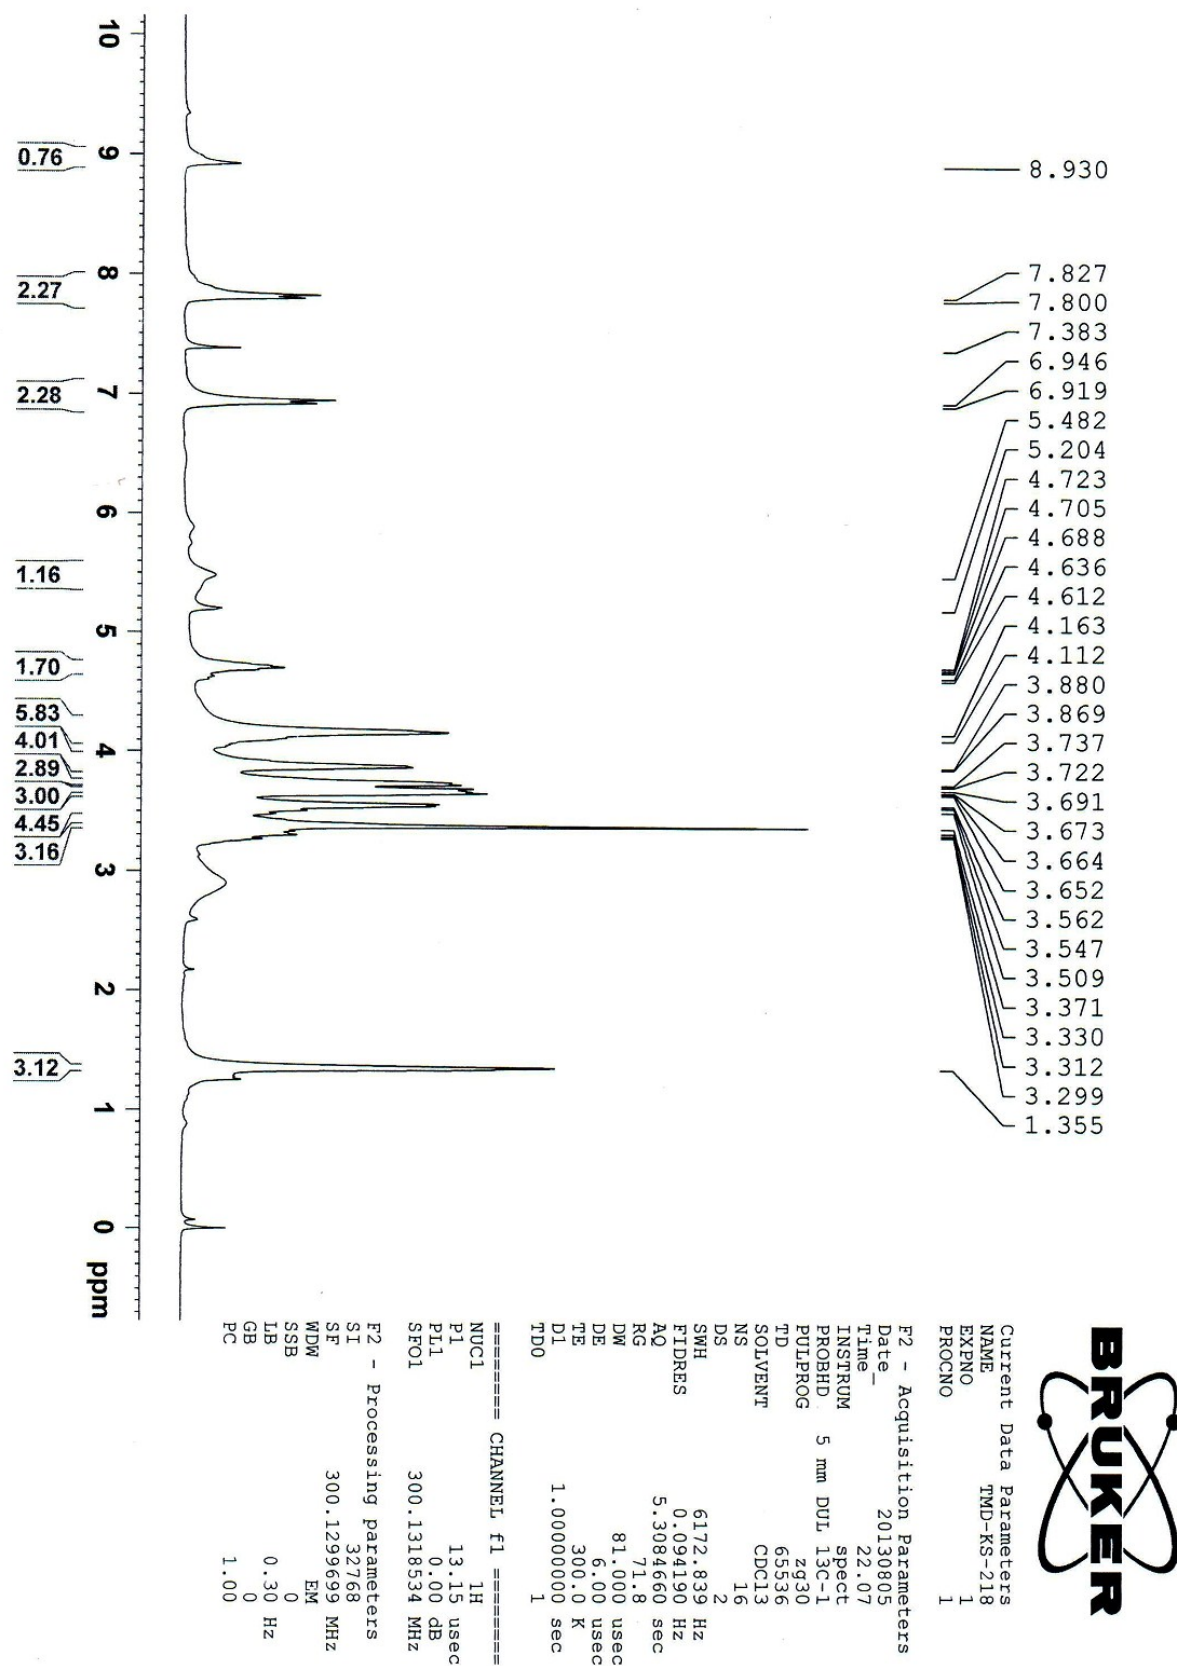

Fig. S.I.2.21:  $^1\text{H}$  NMR spectrum of compound 16

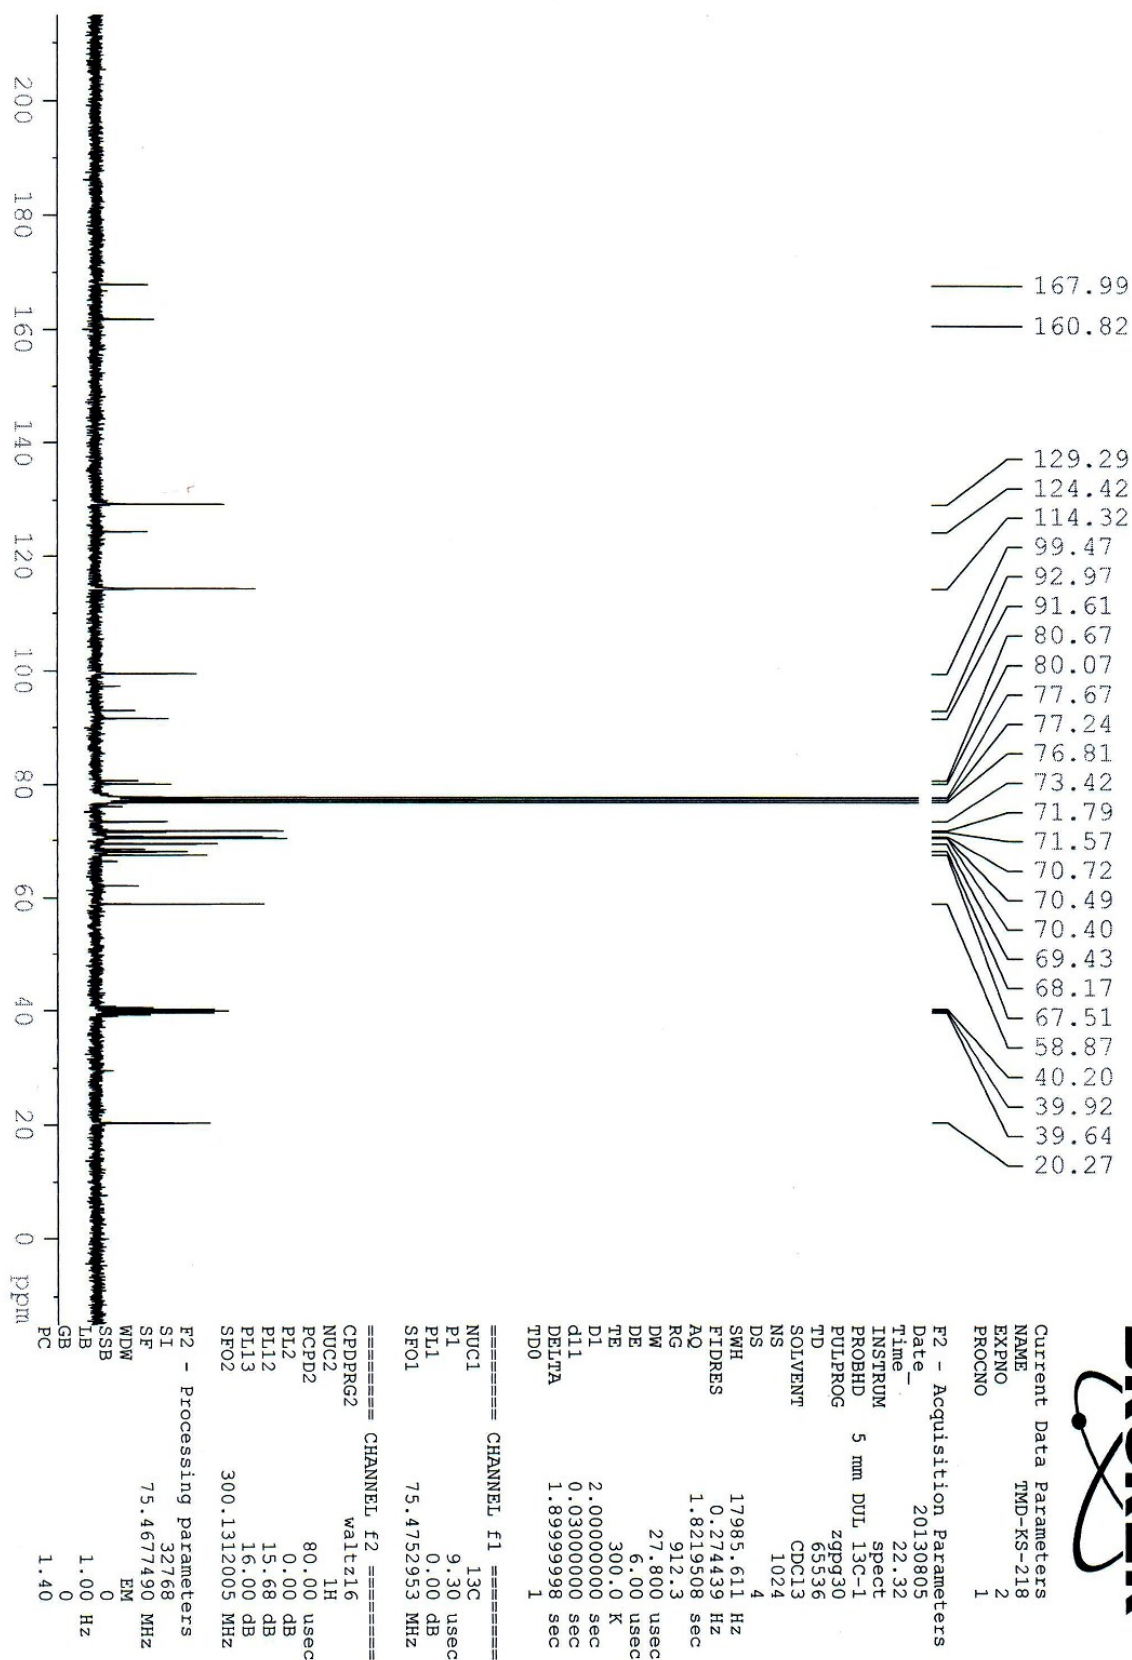

Fig. S.I.2.227:  $^{13}\text{C}$  NMR spectrum of compound 16



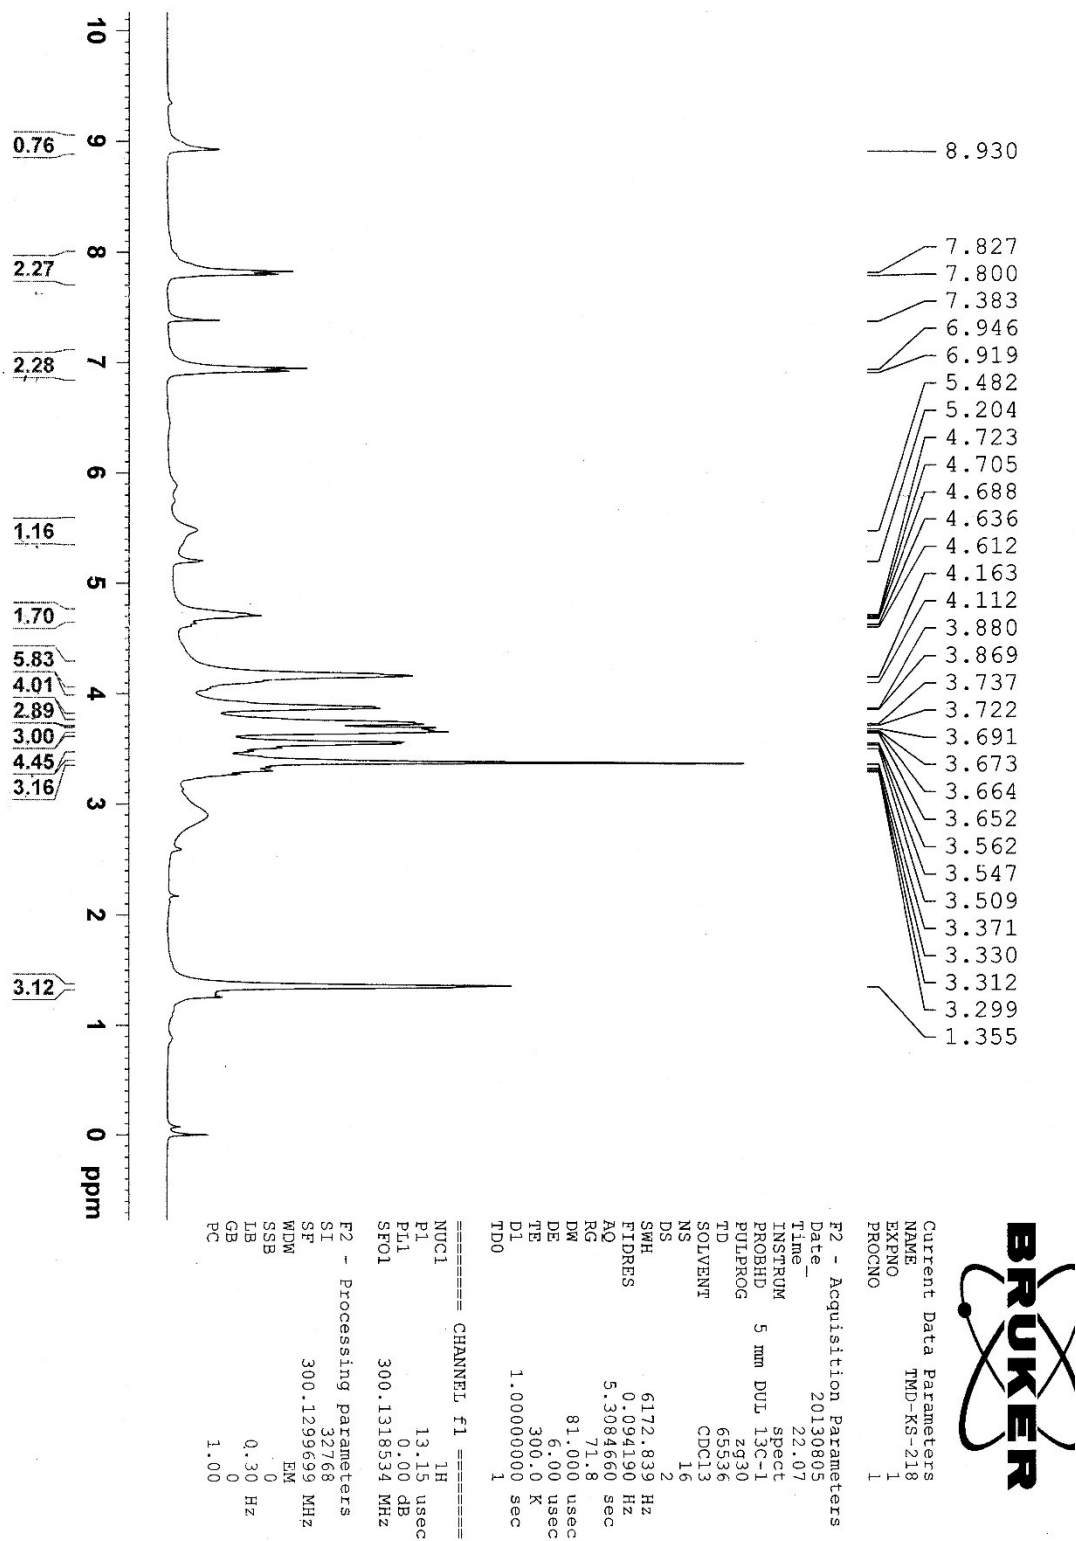

Fig. S.I.2.23:  $^1\text{H}$  NMR spectrum of compound 17

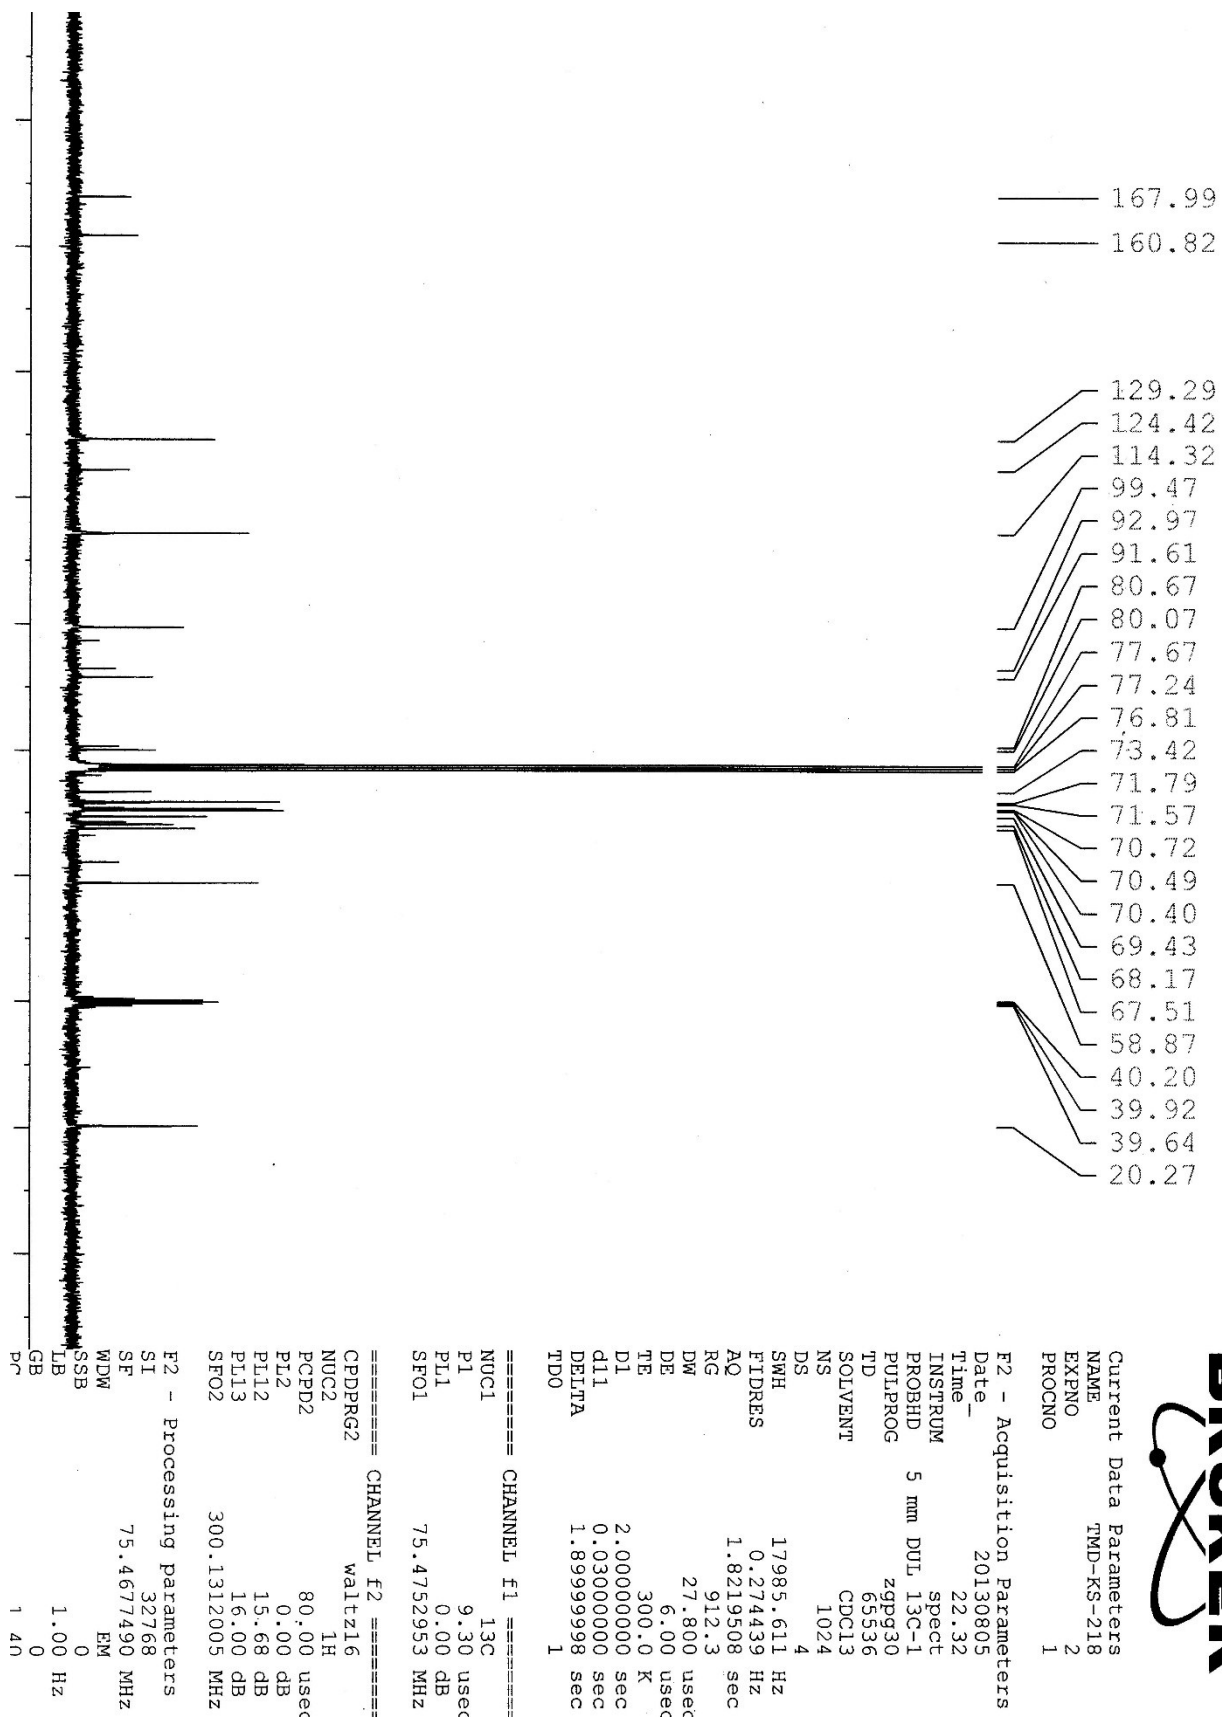

Fig. S.I.2.247:  $^{13}\text{C}$  NMR spectrum of compound 17

Current Data Parameters  
NAME TMD-KS-219  
EXPNO 1  
PROCNO 1

0.897  
0.920  
1.268  
1.401  
1.425  
1.448  
1.619  
2.008  
2.123  
2.169  
2.594  
3.004  
3.243  
3.275  
3.367  
3.459  
3.494  
3.558  
3.651  
3.688  
3.719  
3.879  
4.170  
4.345  
4.525  
4.538  
4.725  
5.021  
5.344  
5.436  
5.526  
5.672  
5.763  
6.925  
6.946

F2 - Acquisition Parameters  
Date\_ 20130805  
Time 21.12  
INSTRUM spect  
PROBHD 5 mm DUL 13C-1  
PULPROG zg30  
TD 65536  
SOLVENT CDCl3  
NS 16  
DS 2  
SWH 6172.839 Hz  
FIDRES 0.094190 Hz  
AQ 5.3084660 sec  
RG 80.6  
DW 81.000 us  
DE 6.00 us  
TE 300.0 K  
D1 1.00000000 sec  
TD0 1

===== CHANNEL f1 =====  
NUC1 1H  
P1 13.15 us  
PL1 0.00 dB  
SFO1 300.1318534 MHz

F2 - Processing parameters  
SI 32768  
SF 300.1299396 MHz  
WDW EM  
SSB 0  
LB 0.30 Hz  
GB 0  
PC 1.00

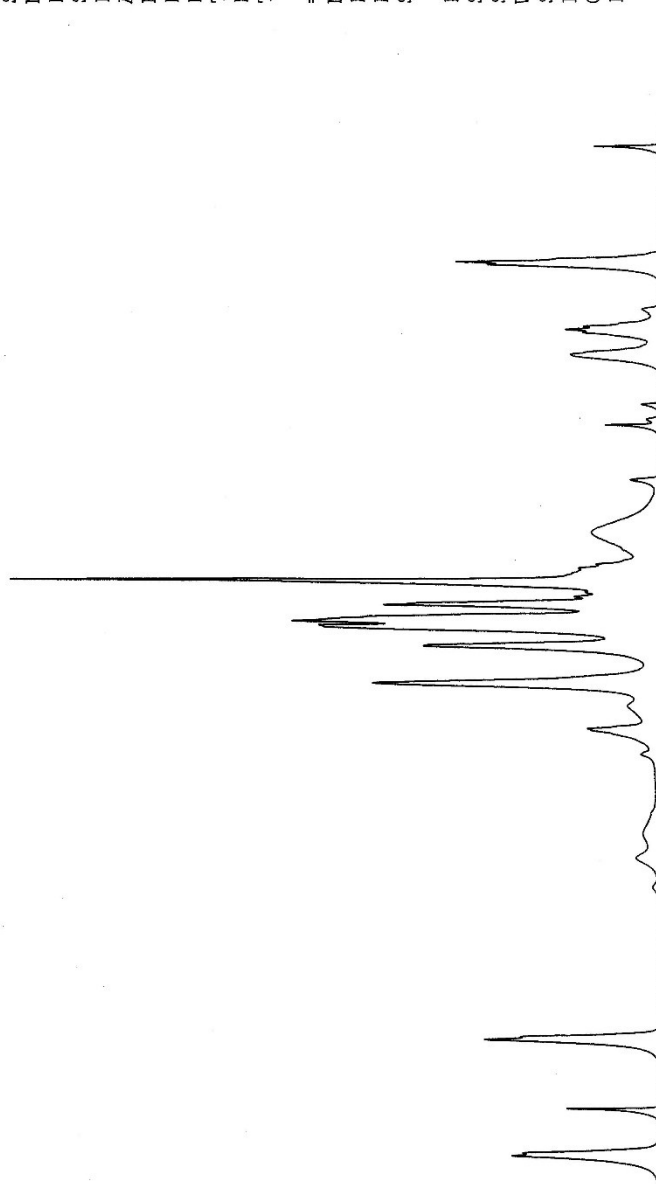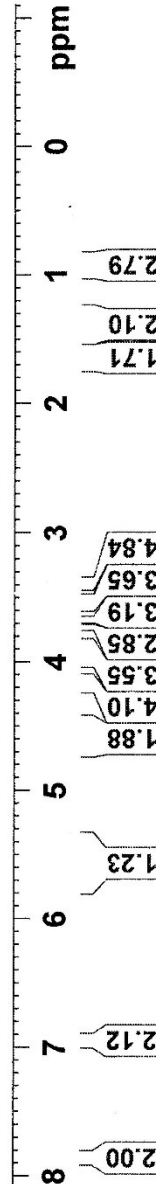

Fig. S.I.2.25:  $^1\text{H}$  NMR spectrum of compound 18

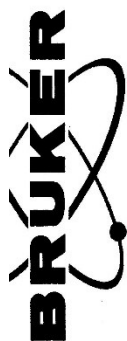

Current Data Parameters  
 NAME TMD-KS-219  
 EXPNO 2  
 PROCNO 1

F2 - Acquisition Parameters  
 Date\_ 20130805  
 Time 21.42  
 INSTRUM spect  
 PROBHD 5 mm DUL 13C-1  
 PULPROG zgpg30  
 TD 65536  
 SOLVENT CDCl3  
 NS 561  
 DS 4  
 SWH 17985.611 Hz  
 FIDRES 0.274439 Hz  
 AQ 1.8219508 sec  
 RG 1448.2  
 DW 27.800 usec  
 DE 6.00 usec  
 TE 300.0 K  
 D1 2.00000000 sec  
 d11 0.03000000 sec  
 DELTA 1.89999998 sec  
 TDO 1

==== CHANNEL f1 =====  
 NUC1 13C  
 P1 9.30 usec  
 PL1 0.00 dB  
 SFO1 75.4752953 MHz

==== CHANNEL f2 =====  
 CPDPRG2 waltz16  
 NUC2 1H  
 PCPD2 80.00 usec  
 PL2 0.00 dB  
 PL12 15.68 dB  
 PL13 16.00 dB  
 SFO2 300.1312005 MHz

F2 - Processing parameters  
 SI 32768  
 SF 75.4677490 MHz  
 WDW EM  
 SSB 0  
 LB 1.00 Hz  
 GB

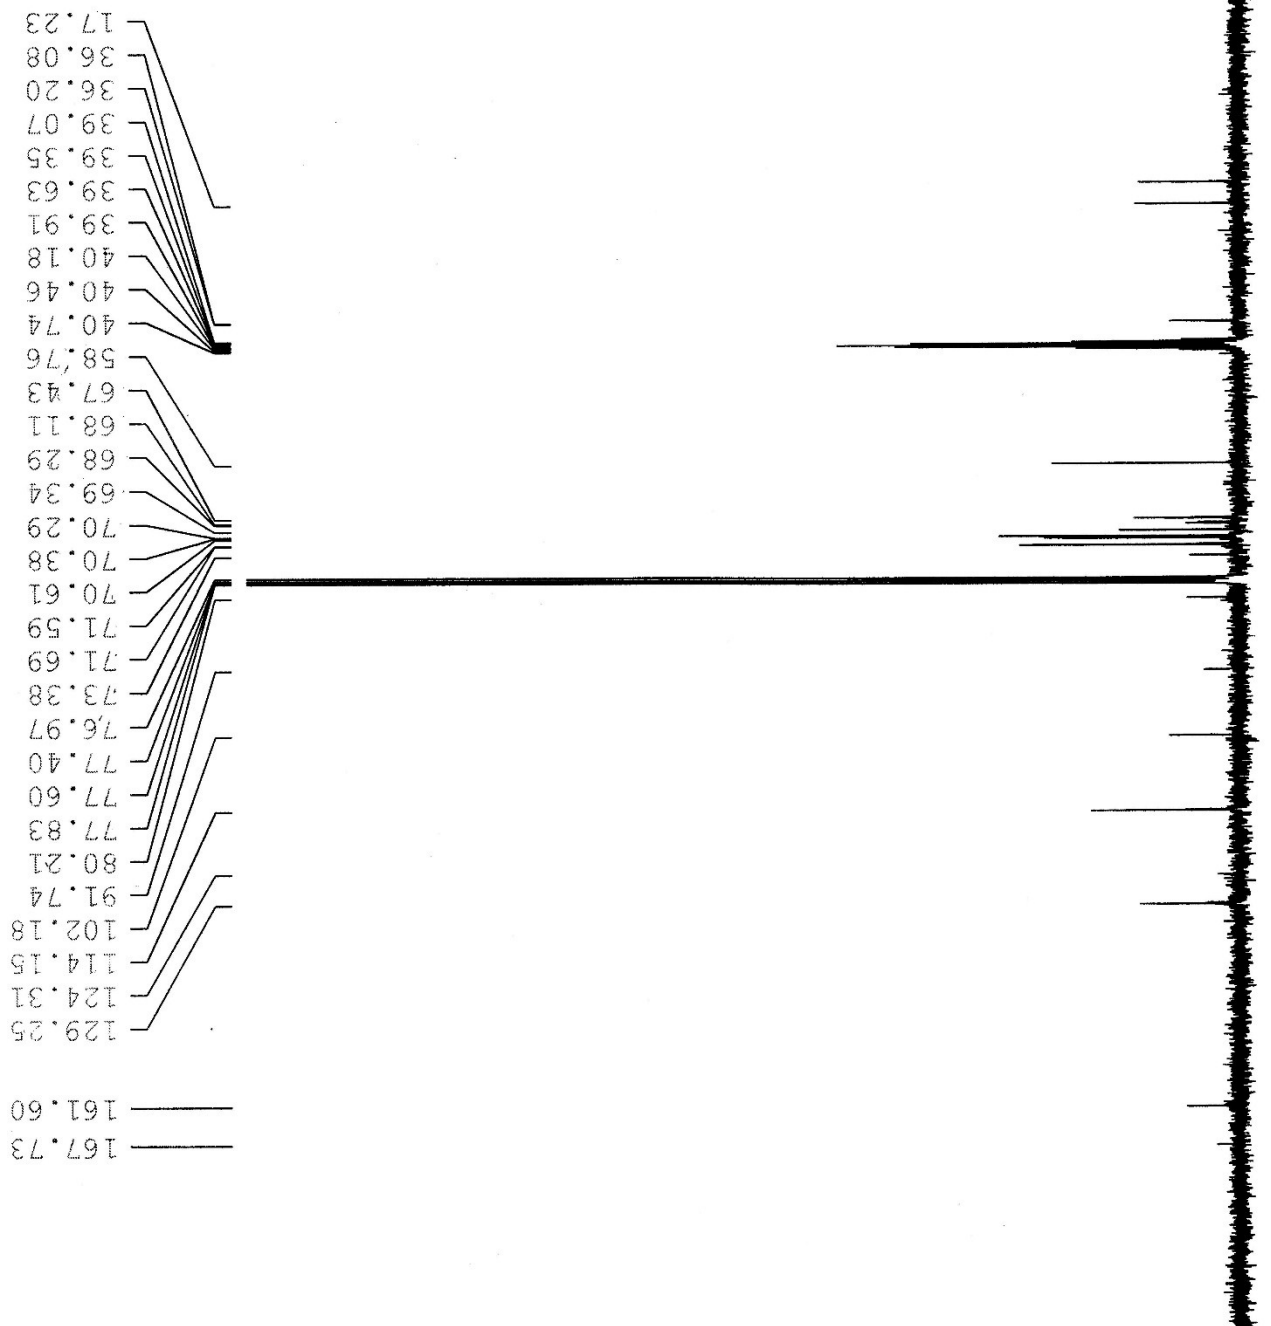

Fig. S.I.2.267: <sup>13</sup>C NMR spectrum of compound 18

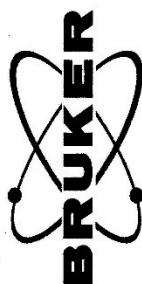

Current Data Parameters  
NAME TMD-KS-213  
EXPNO 1  
PROCNO 1

F2 - Acquisition Parameters  
Date\_ 20130731  
Time\_ 18.28  
INSTRUM spect  
PROBHD 5 mm DUL 13C-1  
PULPROG zg30  
TD 65536  
SOLVENT CDCl3  
NS 16  
DS 2  
SWH 6172.839 Hz  
FIDRES 0.094190 Hz  
AQ 5.3084660 sec  
RG 143.7  
DW 81.000 usec  
DE 6.00 usec  
TE 300.0 K  
D1 1.00000000 sec  
TD0 1

===== CHANNEL f1 =====  
NUC1 1H  
P1 13.15 usec  
PL1 0.00 dB  
SFO1 300.1318534 MHz

F2 - Processing parameters  
SI 32768  
SF 300.1300058 MHz  
WDW EM  
SSB 0  
LB 0.30 Hz  
GB 0  
PC 1.00

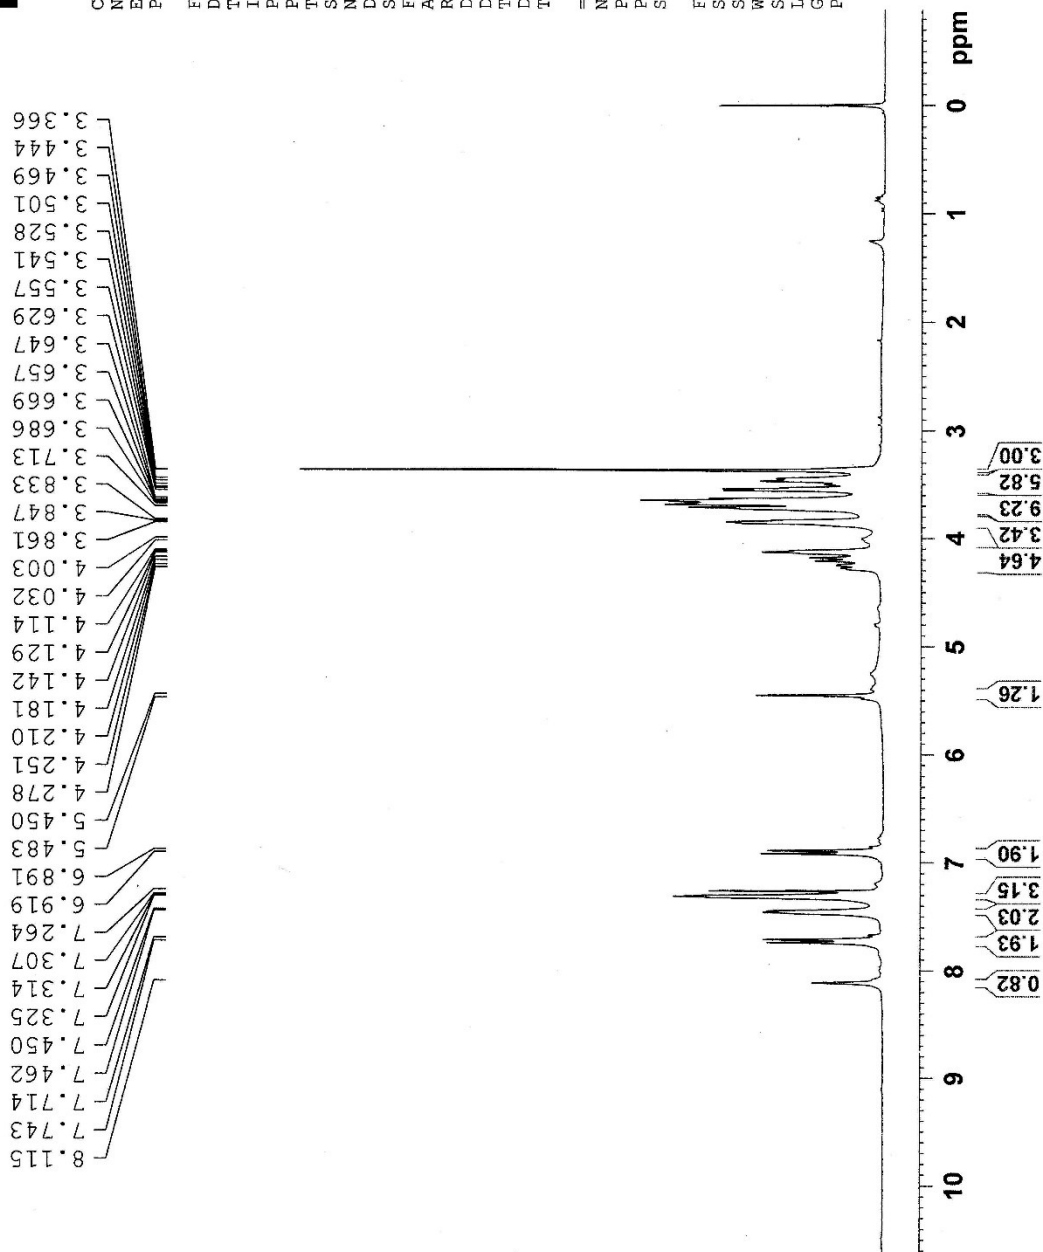

Fig. S.I.2.277:  $^1\text{H}$  NMR spectrum of compound 19

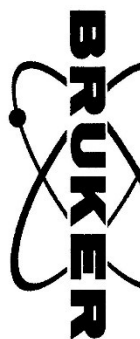

172.19  
166.34  
142.39  
134.25  
133.75  
132.84  
131.29  
131.13  
129.65  
118.95  
106.35  
97.09  
85.97  
83.35  
83.11  
82.92  
82.49  
78.14  
76.74  
76.56  
75.43  
75.21  
75.10  
74.20  
73.47  
72.97  
72.35  
63.56  
45.66  
45.38  
45.10  
44.83  
44.55  
44.27  
43.98

Current Data Parameters  
NAME TMD-KS-213  
EXPNO 4  
PROCNO 1

F2 - Acquisition Parameters  
Date\_ 20130806  
Time 19.19  
INSTRUM spect  
PROBHD 5 mm DUL 13C-1  
PULPROG zgpg30  
TD 65536  
SOLVENT CDCl3  
NS 200  
DS 4  
SWH 17985.611 H  
FIDRES 0.274439 H  
AQ 1.8219508 s  
RG 574.7  
DW 27.800 u  
DE 6.00 u  
TE 300.0 K  
DI 2.00000000 s  
d11 0.03000000 s  
DELTA 1.89999998 s  
TDO 1

===== CHANNEL f1 =====  
NUC1 13C  
P1 9.30 u  
PL1 0.00 d  
SFO1 75.4752953 M

===== CHANNEL f2 =====  
CPDPRG2 waltz16  
NUC2 1H  
PCPD2 80.00 u  
PL2 0.00 d  
PL12 15.68 d  
PL13 16.00 d  
SFO2 300.1312005 M

F2 - Processing parameters  
SI 32768  
SF 75.4677490 M  
WDW EM  
SSB 0  
LB 1.00 H  
GB 0  
PC 1.40

200  
180  
160  
140  
120  
100  
80  
60  
40  
20  
0  
ppm

Fig. S.I.2.287: <sup>13</sup>C NMR spectrum of compound 19



### S.I. 3 Digital photograph of gel of compound 8

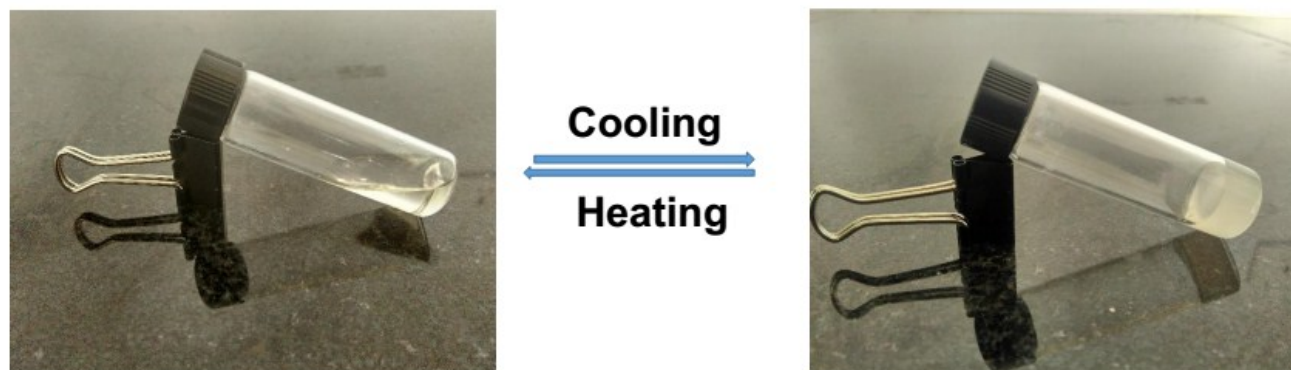

Fig. S.I.3.1: Digital photograph of gel in 1, 2-dichloroethane of compound 8
